# Supplementary material for: Understanding the interplay between π–π and cation–π interactions in [janusene–Ag]+ host–guest systems: a computational approach
Source: Royal Society of Chemistry journal article supplement (doi:10.1039/c9dt02307k), 2019-01-01
Supplement: c9dt02307k1.pdf [file c9dt02307k1.pdf]

**Supporting information for:**

**Understanding the Interplay between  $\pi$ - $\pi$  and  
Cation- $\pi$  Interactions in [Janusene-Ag]<sup>+</sup>  
Host-Guest Systems: A computational Approach.**

Johnatan Mucelini,<sup>†</sup> Ina Østrøm,<sup>†</sup> Alexandre O. Ortolan,<sup>†</sup> Karla F. Andriani,<sup>†</sup>  
Giovanni F. Caramori,<sup>\*,†</sup> Renato L. T. Parreira,<sup>‡</sup> and Kenneth K. Laali<sup>¶</sup>

<sup>†</sup>*Departamento de Química, Universidade Federal de Santa Catarina, Campus  
Universitário Trindade, 88040-900, Florianópolis - SC, Brazil*

<sup>‡</sup>*Núcleo de Pesquisa em Ciências Exatas e Tecnológicas, Universidade de Franca, Franca -  
SP, 14404-600, Brazil.*

<sup>¶</sup>*Department of Chemistry, University of North Florida, Jacksonville, FL 32224-7699, USA*

E-mail: giovanni.caramori@ufsc.br

Phone: +55 (48)3721 6844

## Contents

|   |                           |    |
|---|---------------------------|----|
| 1 | Quadrupole Moments        | S2 |
| 2 | Optimized Structures      | S3 |
| 3 | Natural Charges           | S5 |
| 4 | XYZ Cartesian Coordinates | S5 |

# 1 Quadrupole Moments

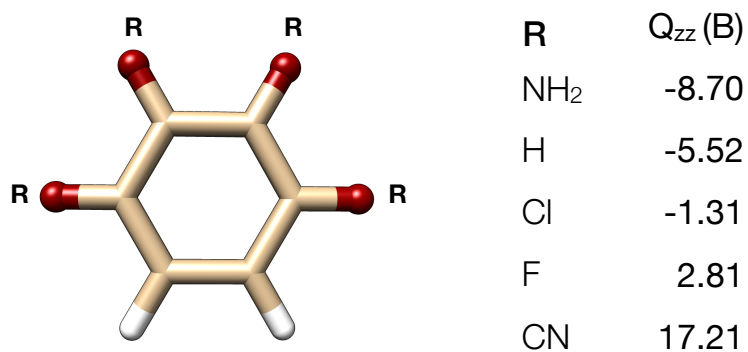

Figure S1: Quadrupole moments ( $Q_{zz}$ ) of selected substituted aromatic rings, calculated at BP86-D3(BJ)/TZ2P level of theory. Color-code: white = hydrogens, tan = carbons, blue = nitrogen, red = oxygen.

## 2 Optimized Structures

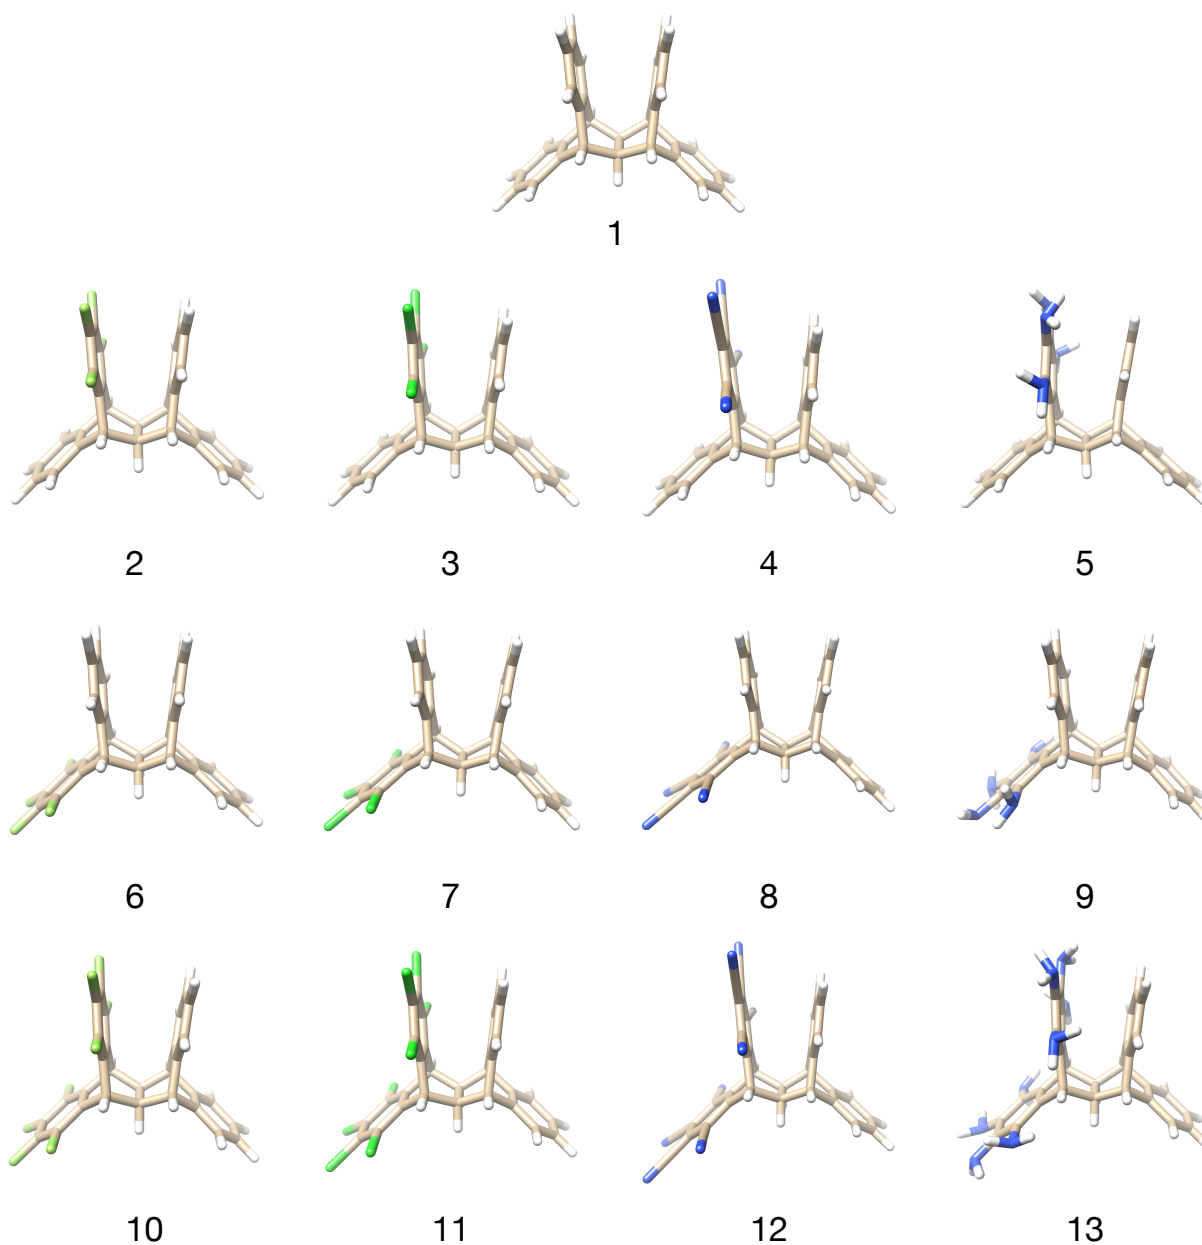

Figure S2: Compounds **1–13** optimized at PB86-D3(BJ)/Def2-TZVP level of theory. First row contains the **F** analogues (**2–5**), second row the **L** analogues (**6–9**), and third row **FL** analogues (**10–13**). Color-code: white = hydrogens, tan = carbons, blue = nitrogen, red = oxygen.

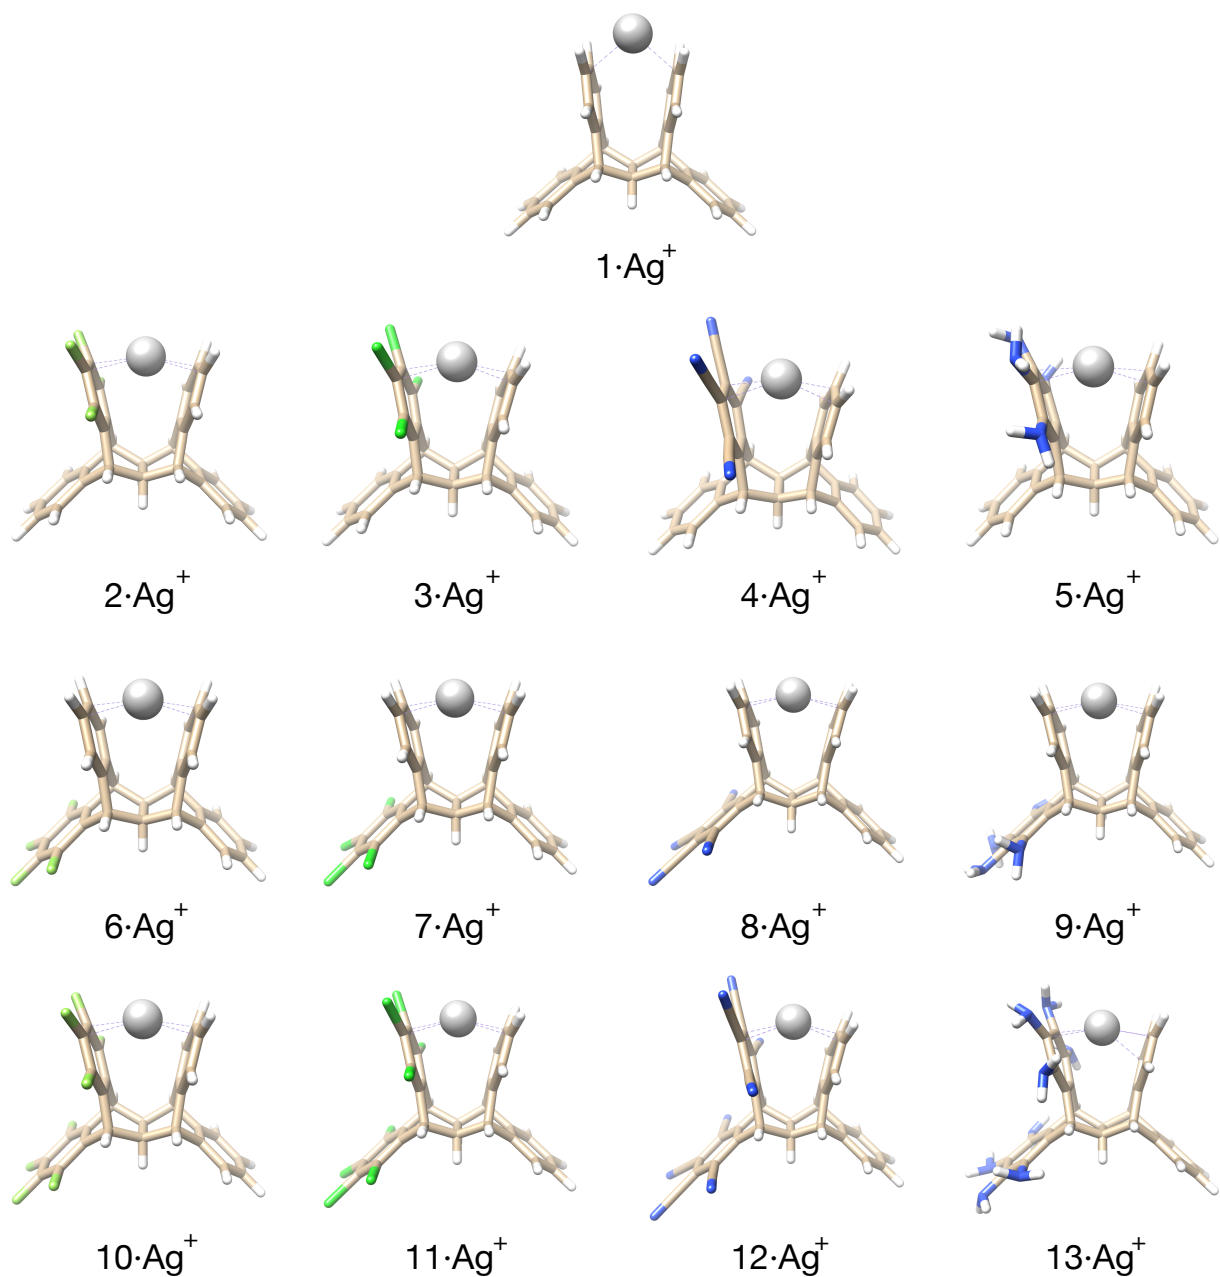

Figure S3: Complexes  $1\cdot\text{Ag}^+$ – $13\cdot\text{Ag}^+$  optimized at PB86-D3(BJ)/Def2-TZVP level of theory. First row contains the **F** analogues ( $2\cdot\text{Ag}^+$ – $5\cdot\text{Ag}^+$ ), second row the **L** analogues ( $6\cdot\text{Ag}^+$ – $9\cdot\text{Ag}^+$ ), and third row **FL** analogues ( $10\cdot\text{Ag}^+$ – $13\cdot\text{Ag}^+$ ). Color-code: white = hydrogens, tan = carbons, blue = nitrogen, red = oxygen. Color-code: white = hydrogens, tan = carbons, blue = nitrogen, red = oxygen.

Table S1: Natural charge in substituted janusenes and in it complexes

|           | NPA charges |         |                             |        |        |        |       |
|-----------|-------------|---------|-----------------------------|--------|--------|--------|-------|
|           | Janusene    |         | [Ag(Janusene)] <sup>+</sup> |        |        |        | Ag    |
|           | C2/C3       | C2'/C3' | C2                          | C3     | C2'    | C3'    |       |
| <b>1</b>  | -0.214      | -0.214  | -0.370                      | -0.237 | -0.370 | -0.239 | 0.795 |
| <b>2</b>  | 0.258       | -0.217  | 0.146                       | 0.256  | -0.366 | -0.241 | 0.768 |
| <b>3</b>  | -0.099      | -0.218  | -0.256                      | -0.134 | -0.375 | -0.251 | 0.848 |
| <b>4</b>  | -0.079      | -0.216  | -0.215                      | -0.093 | -0.387 | -0.235 | 0.866 |
| <b>5</b>  | 0.096       | -0.225  | 0.058                       | 0.006  | -0.360 | -0.229 | 0.756 |
| <b>6</b>  | -0.210      | -0.213  | -0.358                      | -0.250 | -0.371 | -0.236 | 0.799 |
| <b>7</b>  | -0.210      | -0.213  | -0.368                      | -0.234 | -0.368 | -0.240 | 0.798 |
| <b>8</b>  | -0.202      | -0.211  | -0.364                      | -0.228 | -0.368 | -0.236 | 0.804 |
| <b>9</b>  | -0.216      | -0.214  | -0.344                      | -0.283 | -0.376 | -0.229 | 0.792 |
| <b>10</b> | 0.261       | -0.216  | 0.148                       | 0.258  | -0.366 | -0.240 | 0.772 |
| <b>11</b> | -0.097      | -0.217  | -0.256                      | -0.130 | -0.377 | -0.247 | 0.849 |
| <b>12</b> | -0.071      | -0.213  | -0.204                      | -0.085 | -0.389 | -0.231 | 0.873 |
| <b>13</b> | 0.096       | -0.221  | 0.062                       | 0.002  | -0.363 | -0.226 | 0.750 |

### 3 Natural Charges

### 4 XYZ Cartesian Coordinates

1 E=-1157.784368155155 Hartree

|   |                   |                   |                   |
|---|-------------------|-------------------|-------------------|
| C | 1.13781645103649  | -0.30981205974167 | -0.88340453267949 |
| C | 0.48674967154040  | -1.63746059998755 | -1.39955561574136 |
| C | 0.75848302384380  | -1.76431466732667 | 1.17971872101336  |
| C | 0.59819814881409  | 0.89015969887751  | 1.30071652367246  |
| C | 0.42687065331910  | 1.02432722022631  | -1.28706206016233 |
| C | 1.60791507679148  | -2.78548055448637 | 0.44190844799218  |
| C | 2.48097531542789  | -3.70836846174851 | 1.00952621744788  |
| C | 3.19983760912219  | -4.58015634276838 | 0.17959620938190  |
| C | 3.04755060181963  | -4.51800317160829 | -1.20707591978445 |
| C | 2.17491317352751  | -3.58207494963231 | -1.78057189844786 |
| C | 1.45551309081724  | -2.72155924645880 | -0.95733346300433 |
| C | -0.66464181015850 | -1.98910350192735 | 0.72137236329518  |
| C | -1.75905630324138 | -2.28383536957031 | 1.52786442994152  |
| C | -3.01151280510764 | -2.49655382935854 | 0.94049009596293  |
| C | -3.16095820506415 | -2.41186530079728 | -0.44528923103894 |
| C | -2.05920967443433 | -2.11828568012843 | -1.25705737587292 |
| C | -0.81294930599815 | -1.91060726888377 | -0.67439734518115 |
| C | -0.82301132733559 | 1.04000682231542  | 0.80253115010900  |

|   |                   |                   |                   |
|---|-------------------|-------------------|-------------------|
| C | -1.96974094941745 | 1.13708780229624  | 1.58418043806548  |
| C | -3.21290023235258 | 1.32105654974248  | 0.96736544058967  |
| C | -3.30216891358485 | 1.40828192068843  | -0.42345180066102 |
| C | -2.14950346673938 | 1.30791005296151  | -1.21081256310382 |
| C | -0.91457224408897 | 1.12315898261138  | -0.59784218187391 |
| C | 1.29149415180130  | 2.12228607069745  | -0.69060397098069 |
| C | 1.37871819269544  | 2.05391019196120  | 0.71400334495932  |
| C | 2.14611722030630  | 2.97963759010454  | 1.41426053413891  |
| C | 2.82326748892567  | 3.98722239102224  | 0.71279430673958  |
| C | 2.73662512785283  | 4.05557834100319  | -0.67923377249377 |
| C | 1.97181837868830  | 3.11704590963831  | -1.38645384712125 |
| H | 2.59987200172537  | -3.75609954242745 | 2.09447293712788  |
| H | 3.60793022389106  | -5.20096763538832 | -1.84716982107002 |
| H | 2.05565373592220  | -3.53093444623319 | -2.86540925082890 |
| H | -1.64061646804229 | -2.34183305228252 | 2.61223460049148  |
| H | -3.87370720000291 | -2.72605082851802 | 1.56774851429819  |
| H | -4.14012889678731 | -2.57276043203887 | -0.89794220142694 |
| H | -2.17600179350333 | -2.04586548665779 | -2.34074520471334 |
| H | -1.89867583967475 | 1.06327829694505  | 2.67171663728690  |
| H | -4.11498648490208 | 1.39412102199653  | 1.57604519239855  |
| H | -4.27340173270462 | 1.55159811930725  | -0.89869524021238 |
| H | -2.21746151715071 | 1.36679576261331  | -2.29953251047024 |
| H | 2.21504557094629  | 2.92401894275547  | 2.50328076209927  |
| H | 3.41755198377848  | 4.72190857111937  | 1.25816233443618  |
| H | 3.26339298636943  | 4.84354251084601  | -1.21939220767743 |
| H | 2.14202169957764  | -0.26890820447028 | -1.32769100413223 |
| H | 0.34195775535060  | 1.10994210525622  | -2.37963547644042 |
| H | 0.65522524538847  | 0.86217250841410  | 2.39835111982739  |
| H | 0.35813778703255  | -1.61410774292217 | -2.49087284710459 |
| H | 0.86335100061631  | -1.84616624918841 | 2.27112598685184  |
| C | 1.27095346027728  | -0.37629961493704 | 0.67263302667962  |
| H | 2.33500324009929  | -0.32274169891490 | 0.94383383865301  |
| H | 1.90586627241530  | 3.16819159464961  | -2.47595149831509 |
| H | 3.87916183057105  | -5.31121703964591 | 0.62065566707919  |

2 E=-1555.489905441590 Hartree

|   |                  |                   |                   |
|---|------------------|-------------------|-------------------|
| C | 1.16117899503736 | -0.31910332784658 | -0.88540488265709 |
| C | 0.53194984224232 | -1.65361353541069 | -1.41198186224101 |
| C | 0.78700389317572 | -1.78195494300339 | 1.17448505971017  |
| C | 0.61343363066668 | 0.87009802064418  | 1.30402866480194  |
| C | 0.42493015698084 | 1.00290965644489  | -1.28373033012324 |
| C | 1.63611743884249 | -2.80461243060855 | 0.43894207876951  |
| C | 2.50319621606597 | -3.72892651282202 | 1.01347675087239  |

|   |                   |                   |                   |
|---|-------------------|-------------------|-------------------|
| C | 3.22853859011753  | -4.59792046649631 | 0.18685329855280  |
| C | 3.08762222006903  | -4.53298470014851 | -1.20111195230580 |
| C | 2.21956413867029  | -3.59722198017934 | -1.78081545883412 |
| C | 1.49500745775139  | -2.73822342132785 | -0.96038514799620 |
| C | -0.63350102621451 | -1.99182048708418 | 0.70329196981184  |
| C | -1.74679210181839 | -2.21106317463432 | 1.49527192550589  |
| C | -3.01114245698585 | -2.35680959309833 | 0.91555709845832  |
| C | -3.14955754561877 | -2.27776909288253 | -0.47067448089375 |
| C | -2.02236316003736 | -2.05655032466411 | -1.26892854134586 |
| C | -0.77172000761140 | -1.91570243012291 | -0.69319694189705 |
| C | -0.81327800571054 | 1.00182840170105  | 0.81529298895061  |
| C | -1.95568681328500 | 1.08731069656591  | 1.60577027494126  |
| C | -3.20625306206407 | 1.25083069728661  | 0.99598445254176  |
| C | -3.30635737456503 | 1.32871375798351  | -0.39509864381523 |
| C | -2.15730919067129 | 1.24247837174668  | -1.19120438987991 |
| C | -0.91489679183337 | 1.07959819492123  | -0.58546361115153 |
| C | 1.27684045354374  | 2.11298691236381  | -0.69102656090394 |
| C | 1.37569155772632  | 2.04354349952872  | 0.71228776442715  |
| C | 2.13538196703423  | 2.97845974631352  | 1.40880520556648  |
| C | 2.79301838531300  | 3.99597784630695  | 0.70347981400706  |
| C | 2.69442715307375  | 4.06559108140017  | -0.68777380812628 |
| C | 1.93729022013055  | 3.11814087907364  | -1.39101606036716 |
| H | 2.61210559132548  | -3.77945308282534 | 2.09908510223240  |
| H | 3.65309091307362  | -5.21484153474828 | -1.83764086792859 |
| H | 2.10766225755010  | -3.54495785725184 | -2.86612800329149 |
| F | -1.64735961315901 | -2.24840142544556 | 2.84553565025984  |
| F | -4.09772290690587 | -2.54404104074039 | 1.68507315618056  |
| F | -4.36852651589850 | -2.38944996142016 | -1.02720782891512 |
| F | -2.19113684335033 | -1.94533401361558 | -2.60794956684796 |
| H | -1.87645457709609 | 1.02110875435794  | 2.69311269764171  |
| H | -4.10472055085132 | 1.31579270981868  | 1.61065276590843  |
| H | -4.28256888211977 | 1.45537015875308  | -0.86438209635469 |
| H | -2.23473473685583 | 1.29451534387137  | -2.27934951506599 |
| H | 2.21305556318549  | 2.92245164099610  | 2.49709134731817  |
| H | 3.38133670855422  | 4.73792350361166  | 1.24531534402925  |
| H | 3.20589709751655  | 4.86181487916253  | -1.23033050646150 |
| H | 2.16400801825188  | -0.26240817697311 | -1.33046398542424 |
| H | 0.33189906106361  | 1.08730782722009  | -2.37537643585110 |
| H | 0.67797059468382  | 0.84130444893789  | 2.40083319593407  |
| H | 0.40689936142128  | -1.62969520478869 | -2.50125937212448 |
| H | 0.87884602044483  | -1.86604336725293 | 2.26447624947030  |
| C | 1.29412050344605  | -0.38953934733762 | 0.67057965834392  |
| H | 2.35720487961565  | -0.33613945401663 | 0.94414475512658  |
| H | 1.86162896809057  | 3.17046867119329  | -2.47970600638665 |
| H | 3.90394430798792  | -5.33013681345774 | 0.63158658782757  |

3 E=-3005.498747824671 Hartree

|    |                   |                   |                   |
|----|-------------------|-------------------|-------------------|
| C  | 1.18188517900841  | -0.31499063143178 | -0.88721622650438 |
| C  | 0.56510496529187  | -1.65421515374573 | -1.41490799159714 |
| C  | 0.80685159457852  | -1.78187669930006 | 1.16381580747658  |
| C  | 0.63307777565532  | 0.86726539038432  | 1.30622269355377  |
| C  | 0.42926570231329  | 0.99993835683834  | -1.28089293720979 |
| C  | 1.65680349629904  | -2.80700315028566 | 0.43614656048700  |
| C  | 2.51414673875268  | -3.73669597849347 | 1.01676019291631  |
| C  | 3.23977395680987  | -4.60842617969692 | 0.19331818918183  |
| C  | 3.10761810830090  | -4.54177582547442 | -1.19571616239455 |
| C  | 2.24778706172934  | -3.60173332946925 | -1.78062055057983 |
| C  | 1.52430263435217  | -2.73922088803377 | -0.96273473497835 |
| C  | -0.61399133510124 | -1.98528378966072 | 0.68937726694771  |
| C  | -1.73565629738730 | -2.18328723153369 | 1.48754744290036  |
| C  | -3.00790047642471 | -2.30616922477215 | 0.89909422835702  |
| C  | -3.13894432842835 | -2.23535914519502 | -0.49919421394269 |
| C  | -1.99661729908002 | -2.04288200633453 | -1.29828724236392 |
| C  | -0.74465160945570 | -1.91389269183505 | -0.70637177153635 |
| C  | -0.79769041158141 | 0.98960888425030  | 0.82616632604672  |
| C  | -1.93632788391216 | 1.06364952886880  | 1.62319893231232  |
| C  | -3.19277584543613 | 1.20249776242891  | 1.01999672135197  |
| C  | -3.30152232928274 | 1.27619543593232  | -0.37057299118447 |
| C  | -2.15532600752655 | 1.21209034651155  | -1.17248285641807 |
| C  | -0.90755404234017 | 1.06488320759285  | -0.57409042746942 |
| C  | 1.27574123223779  | 2.11623094534552  | -0.69212550717408 |
| C  | 1.38426710659112  | 2.04574118329802  | 0.71059997395228  |
| C  | 2.14110461146834  | 2.98581632940479  | 1.40325375623918  |
| C  | 2.78588909906617  | 4.00955979903590  | 0.69505931871156  |
| C  | 2.67750707102864  | 4.08029413086962  | -0.69540436849809 |
| C  | 1.92348724047226  | 3.12759138720671  | -1.39496388995769 |
| H  | 2.61487121845163  | -3.78897062806208 | 2.10298904017126  |
| H  | 3.67333624447284  | -5.22647512676975 | -1.82897365610427 |
| H  | 2.14126593214993  | -3.54867533970158 | -2.86636384413971 |
| Cl | -1.57533013087172 | -2.20770346083727 | 3.21580429081193  |
| Cl | -4.40749635580166 | -2.48595366240981 | 1.88933573188997  |
| Cl | -4.69978802477373 | -2.32874835262829 | -1.22509422324184 |
| Cl | -2.16013332737455 | -1.90044127851107 | -3.02080734329289 |
| H  | -1.85049115761825 | 0.99961623244190  | 2.70989266612204  |
| H  | -4.08921679500387 | 1.24715948528319  | 1.63907201745753  |
| H  | -4.28242142878779 | 1.37969572677389  | -0.83537229373868 |
| H  | -2.23985191982121 | 1.26186559287584  | -2.26002834043921 |
| H  | 2.22604866600472  | 2.92914648806551  | 2.49095152785806  |
| H  | 3.37171117623537  | 4.75557236163867  | 1.23405078369885  |
| H  | 3.17885891465084  | 4.88147773321754  | -1.24012078974031 |



|   |                  |                   |                   |
|---|------------------|-------------------|-------------------|
| H | 2.18302310964718 | -0.24731207835733 | -1.33457185673403 |
| H | 0.32780133241659 | 1.08280306882484  | -2.37171915826788 |
| H | 0.70431313617218 | 0.83607973846740  | 2.40235263693910  |
| H | 0.44214416668524 | -1.62877623642211 | -2.50343211479039 |
| H | 0.89101780440506 | -1.86704463631919 | 2.25332149305405  |
| C | 1.31617915744628 | -0.38840509195380 | 0.66692684358866  |
| H | 2.37894168274857 | -0.33754529982696 | 0.94200255670157  |
| H | 1.83996795427963 | 3.18081800509544  | -2.48302522265734 |
| H | 3.90837793628745 | -5.34493300359073 | 0.64124071622774  |

4 E=-1527.223775999567 Hartree

|   |                   |                   |                   |
|---|-------------------|-------------------|-------------------|
| C | 0.38332086969894  | -1.45843010177366 | 0.98790683941974  |
| C | -0.00496198226515 | -2.46157776823232 | -0.15171004369023 |
| C | -0.67844865206686 | -3.46255106770114 | 2.15533872832111  |
| C | -0.79343989134496 | -1.02955160623933 | 3.21302704731210  |
| C | -0.22874063871529 | -0.02237029719244 | 0.88413672797139  |
| C | 0.35377784813341  | -4.30043231984635 | 1.41653636937603  |
| C | 0.93899107158931  | -5.47729424539363 | 1.87294373639670  |
| C | 1.90152566991777  | -6.11274972827295 | 1.07763055226893  |
| C | 2.26865693188092  | -5.57125868009490 | -0.15693126960576 |
| C | 1.67883412561887  | -4.38648133803393 | -0.61662493827678 |
| C | 0.72377884817040  | -3.75525410254712 | 0.17445772286984  |
| C | -1.83628734783590 | -3.31633538439617 | 1.20068491956861  |
| C | -3.16640926650557 | -3.66581640128553 | 1.45330340014571  |
| C | -4.14618756848772 | -3.50778666821260 | 0.43919983719248  |
| C | -3.77457962064816 | -2.99602885711549 | -0.81982634520066 |
| C | -2.42466909234953 | -2.63064143276570 | -1.05855997393604 |
| C | -1.47005855861805 | -2.79103130507646 | -0.04957710542792 |
| C | -2.01975755709553 | -0.61295978005537 | 2.43396700590525  |
| C | -3.34254215743196 | -0.71890274035859 | 2.85389914221706  |
| C | -4.37083144258157 | -0.30148531821761 | 1.99916401997443  |
| C | -4.06962539406182 | 0.22468698228548  | 0.73991516470088  |
| C | -2.73706090149443 | 0.34336243563296  | 0.32328184318363  |
| C | -1.71490989923008 | -0.07743230144430 | 1.16970437942992  |
| C | 0.40813764819501  | 0.73948750336641  | 2.03341689065451  |
| C | 0.10814216839012  | 0.18983508066368  | 3.29373702451862  |
| C | 0.63065362900404  | 0.75973659100960  | 4.45038540250423  |
| C | 1.45230099459657  | 1.89049396969614  | 4.34893328386755  |
| C | 1.74969812588785  | 2.43590860360640  | 3.09823748895799  |
| C | 1.23021766448888  | 1.85746941824449  | 1.93245371369198  |
| H | 0.64882169933823  | -5.89851755725996 | 2.83682366887888  |
| H | 3.01583426369213  | -6.07586543429185 | -0.77050805569355 |
| H | 1.95994869789760  | -3.96495491329407 | -1.58294686844532 |

|   |                   |                   |                   |
|---|-------------------|-------------------|-------------------|
| C | -3.53453014119452 | -4.13021972046583 | 2.74952281913498  |
| C | -5.50764573346638 | -3.81977004661408 | 0.71275989700641  |
| C | -4.75661322031118 | -2.79358703119191 | -1.82980435432035 |
| C | -2.04080144482944 | -2.04354580657963 | -2.29927046777470 |
| H | -3.57718643902619 | -1.13704747427651 | 3.83455002294031  |
| H | -5.41018970280476 | -0.39042741855131 | 2.31739840358711  |
| H | -4.87426325285782 | 0.54397592965896  | 0.07710854932679  |
| H | -2.50225811782027 | 0.75220461204298  | -0.66129800021241 |
| H | 0.39550337829454  | 0.33423362542921  | 5.42797010151422  |
| H | 1.85615668197802  | 2.34887191788929  | 5.25209467033914  |
| H | 2.38489868206002  | 3.31967431706562  | 3.02724825763350  |
| H | 1.47322311813865  | -1.34454607158142 | 0.92061482056897  |
| H | -0.00680733236031 | 0.43013330262759  | -0.09194686162857 |
| H | -1.04306204378969 | -1.43137679803419 | 4.20384883579492  |
| H | 0.26316332071558  | -2.06359487335720 | -1.13801020406764 |
| H | -0.98114039878574 | -3.91284222295340 | 3.10833147314256  |
| C | 0.01377660153355  | -2.07374265584362 | 2.37494917743788  |
| H | 0.93457031418656  | -2.28948201370889 | 2.93414807815835  |
| H | 1.46078801881007  | 2.28377745040761  | 0.95440190722527  |
| H | 2.36222252590118  | -7.03825012654694 | 1.42333876764477  |
| N | -3.78639557987143 | -4.48925407416917 | 3.82898281858990  |
| N | -6.61973842896211 | -4.06972660551342 | 0.95371737214628  |
| N | -5.55185471101017 | -2.61282210425525 | -2.66190176788205 |
| N | -1.67893638029562 | -1.54553334688217 | -3.28870762535694 |

5 E=-1379.546233849951 Hartree

|   |                   |                   |                   |
|---|-------------------|-------------------|-------------------|
| C | 1.17862900000000  | -0.18167900000000 | -0.87661700000000 |
| C | 0.36004800000000  | -1.43208800000000 | -1.34984900000000 |
| C | 0.74092100000000  | -1.58242200000000 | 1.21312300000000  |
| C | 0.72798400000000  | 1.07265700000000  | 1.28690100000000  |
| C | 0.60325700000000  | 1.21284400000000  | -1.28952900000000 |
| C | 1.46217300000000  | -2.67381900000000 | 0.44043300000000  |
| C | 2.27888500000000  | -3.66808400000000 | 0.97034600000000  |
| C | 2.87149400000000  | -4.60531000000000 | 0.11262000000000  |
| C | 2.64996700000000  | -4.53779800000000 | -1.26434100000000 |
| C | 1.83483400000000  | -3.53064100000000 | -1.80065100000000 |
| C | 1.24123100000000  | -2.60394600000000 | -0.94957500000000 |
| C | -0.71611200000000 | -1.69371700000000 | 0.82807800000000  |
| C | -1.78401200000000 | -1.94473600000000 | 1.68564000000000  |
| C | -3.07654500000000 | -2.06722600000000 | 1.16110400000000  |
| C | -3.28683500000000 | -1.94609900000000 | -0.21434900000000 |
| C | -2.21076900000000 | -1.71036000000000 | -1.07889800000000 |
| C | -0.92539700000000 | -1.58781400000000 | -0.55866800000000 |

|   |                   |                   |                   |
|---|-------------------|-------------------|-------------------|
| C | -0.68318500000000 | 1.28064000000000  | 0.76954800000000  |
| C | -1.84696000000000 | 1.33324600000000  | 1.53550500000000  |
| C | -3.08815200000000 | 1.45924000000000  | 0.87881100000000  |
| C | -3.15397800000000 | 1.46579500000000  | -0.52090700000000 |
| C | -1.97377400000000 | 1.47679700000000  | -1.28774600000000 |
| C | -0.74696100000000 | 1.38102500000000  | -0.63156000000000 |
| C | 1.53208000000000  | 2.24829100000000  | -0.68804900000000 |
| C | 1.58699500000000  | 2.18422100000000  | 0.71782000000000  |
| C | 2.39675700000000  | 3.06565400000000  | 1.42773400000000  |
| C | 3.14728400000000  | 4.02662200000000  | 0.73496200000000  |
| C | 3.09368700000000  | 4.08980400000000  | -0.65887100000000 |
| C | 2.28777000000000  | 3.19355400000000  | -1.37555400000000 |
| H | 2.45170400000000  | -3.72000900000000 | 2.04775900000000  |
| H | 3.11141800000000  | -5.27224100000000 | -1.92601700000000 |
| H | 1.66224000000000  | -3.47552200000000 | -2.87792100000000 |
| H | -1.60746600000000 | -2.06036100000000 | 2.75826200000000  |
| H | -3.92011900000000 | -2.25703600000000 | 1.82545100000000  |
| H | -4.29536600000000 | -2.03845000000000 | -0.61941900000000 |
| H | -2.37768200000000 | -1.60799700000000 | -2.15309900000000 |
| N | -1.88446100000000 | 1.23874600000000  | 2.95685100000000  |
| N | -4.28193600000000 | 1.46311500000000  | 1.62920900000000  |
| N | -4.41366700000000 | 1.47237700000000  | -1.15861500000000 |
| N | -2.11564500000000 | 1.44973200000000  | -2.70238300000000 |
| H | 2.44265800000000  | 3.01264800000000  | 2.51842300000000  |
| H | 3.77475900000000  | 4.72707500000000  | 1.28818500000000  |
| H | 3.67951400000000  | 4.83931500000000  | -1.19307000000000 |
| H | 2.17199600000000  | -0.26872300000000 | -1.33954200000000 |
| H | 0.57633600000000  | 1.29527500000000  | -2.38620000000000 |
| H | 0.79010800000000  | 1.03878400000000  | 2.38473500000000  |
| H | 0.17779600000000  | -1.39838800000000 | -2.43308500000000 |
| H | 0.89426600000000  | -1.67285100000000 | 2.29818600000000  |
| C | 1.33188600000000  | -0.23710800000000 | 0.67610300000000  |
| H | 2.40120600000000  | -0.24242000000000 | 0.93272900000000  |
| H | 2.24950200000000  | 3.23962200000000  | -2.46700700000000 |
| H | 3.50597700000000  | -5.39189900000000 | 0.52409900000000  |
| H | -4.97552400000000 | 2.10713800000000  | 1.24482100000000  |
| H | -4.08158600000000 | 1.71163300000000  | 2.60086200000000  |
| H | -4.34272700000000 | 1.05856600000000  | -2.09103100000000 |
| H | -5.10029400000000 | 0.94657100000000  | -0.61339300000000 |
| H | -1.21495400000000 | 1.47856000000000  | -3.17630600000000 |
| H | -2.68149400000000 | 2.22950700000000  | -3.04461400000000 |
| H | -0.95619400000000 | 1.31734600000000  | 3.36785900000000  |
| H | -2.28268100000000 | 0.34052400000000  | 3.24983500000000  |

6 E=-1555.489905442042 Hartree

|   |                   |                   |                   |
|---|-------------------|-------------------|-------------------|
| C | 1.16117899503736  | -0.31910332784658 | -0.88540488265709 |
| C | 0.53194984224232  | -1.65361353541069 | -1.41198186224101 |
| C | 0.78700389317572  | -1.78195494300339 | 1.17448505971017  |
| C | 0.61343363066668  | 0.87009802064418  | 1.30402866480194  |
| C | 0.42493015698084  | 1.00290965644489  | -1.28373033012324 |
| C | 1.63611743884249  | -2.80461243060855 | 0.43894207876951  |
| C | 2.50319621606597  | -3.72892651282202 | 1.01347675087239  |
| C | 3.22853859011753  | -4.59792046649631 | 0.18685329855280  |
| C | 3.08762222006903  | -4.53298470014851 | -1.20111195230580 |
| C | 2.21956413867029  | -3.59722198017934 | -1.78081545883412 |
| C | 1.49500745775139  | -2.73822342132785 | -0.96038514799620 |
| C | -0.63350102621451 | -1.99182048708418 | 0.70329196981184  |
| C | -1.74679210181839 | -2.21106317463432 | 1.49527192550589  |
| C | -3.01114245698585 | -2.35680959309833 | 0.91555709845832  |
| C | -3.14955754561877 | -2.27776909288253 | -0.47067448089375 |
| C | -2.02236316003736 | -2.05655032466411 | -1.26892854134586 |
| C | -0.77172000761140 | -1.91570243012291 | -0.69319694189705 |
| C | -0.81327800571054 | 1.00182840170105  | 0.81529298895061  |
| C | -1.95568681328500 | 1.08731069656591  | 1.60577027494126  |
| C | -3.20625306206407 | 1.25083069728661  | 0.99598445254176  |
| C | -3.30635737456503 | 1.32871375798351  | -0.39509864381523 |
| C | -2.15730919067129 | 1.24247837174668  | -1.19120438987991 |
| C | -0.91489679183337 | 1.07959819492123  | -0.58546361115153 |
| C | 1.27684045354374  | 2.11298691236381  | -0.69102656090394 |
| C | 1.37569155772632  | 2.04354349952872  | 0.71228776442715  |
| C | 2.13538196703423  | 2.97845974631352  | 1.40880520556648  |
| C | 2.79301838531300  | 3.99597784630695  | 0.70347981400706  |
| C | 2.69442715307375  | 4.06559108140017  | -0.68777380812628 |
| C | 1.93729022013055  | 3.11814087907364  | -1.39101606036716 |
| H | 2.61210559132548  | -3.77945308282534 | 2.09908510223240  |
| H | 3.65309091307362  | -5.21484153474828 | -1.83764086792859 |
| H | 2.10766225755010  | -3.54495785725184 | -2.86612800329149 |
| F | -1.64735961315901 | -2.24840142544556 | 2.84553565025984  |
| F | -4.09772290690587 | -2.54404104074039 | 1.68507315618056  |
| F | -4.36852651589850 | -2.38944996142016 | -1.02720782891512 |
| F | -2.19113684335033 | -1.94533401361558 | -2.60794956684796 |
| H | -1.87645457709609 | 1.02110875435794  | 2.69311269764171  |
| H | -4.10472055085132 | 1.31579270981868  | 1.61065276590843  |
| H | -4.28256888211977 | 1.45537015875308  | -0.86438209635469 |
| H | -2.23473473685583 | 1.29451534387137  | -2.27934951506599 |
| H | 2.21305556318549  | 2.92245164099610  | 2.49709134731817  |
| H | 3.38133670855422  | 4.73792350361166  | 1.24531534402925  |
| H | 3.20589709751655  | 4.86181487916253  | -1.23033050646150 |

|   |                  |                   |                   |
|---|------------------|-------------------|-------------------|
| H | 2.16400801825188 | -0.26240817697311 | -1.33046398542424 |
| H | 0.33189906106361 | 1.08730782722009  | -2.37537643585110 |
| H | 0.67797059468382 | 0.84130444893789  | 2.40083319593407  |
| H | 0.40689936142128 | -1.62969520478869 | -2.50125937212448 |
| H | 0.87884602044483 | -1.86604336725293 | 2.26447624947030  |
| C | 1.29412050344605 | -0.38953934733762 | 0.67057965834392  |
| H | 2.35720487961565 | -0.33613945401663 | 0.94414475512658  |
| H | 1.86162896809057 | 3.17046867119329  | -2.47970600638665 |
| H | 3.90394430798792 | -5.33013681345774 | 0.63158658782757  |

7 E=-3005.490298446442 Hartree

|    |                   |                   |                   |
|----|-------------------|-------------------|-------------------|
| C  | 1.12578985250629  | -0.28991795995246 | -0.88099112125911 |
| C  | 0.46949566129115  | -1.61435376065830 | -1.39671449399941 |
| C  | 0.73275023907455  | -1.74073875679164 | 1.17944542588783  |
| C  | 0.59230012194753  | 0.90882056699478  | 1.30452463920247  |
| C  | 0.41184036088619  | 1.04211909973471  | -1.28376223775471 |
| C  | 1.58117869999819  | -2.76561285376624 | 0.44565373379175  |
| C  | 2.45122191872611  | -3.68966839039129 | 1.01598758313290  |
| C  | 3.17801870500180  | -4.57608927657989 | 0.19429193662817  |
| C  | 3.03122849833679  | -4.51134390654274 | -1.20350790609800 |
| C  | 2.15916593873963  | -3.56004177717452 | -1.77239314310328 |
| C  | 1.43497103100879  | -2.70063078166033 | -0.95194189394840 |
| C  | -0.68818891559329 | -1.96952855056433 | 0.71711646056671  |
| C  | -1.78235274174823 | -2.26892286246977 | 1.52218889697616  |
| C  | -3.03095798171342 | -2.48550199059788 | 0.92859857384534  |
| C  | -3.17560327865855 | -2.40289682439203 | -0.45822720087127 |
| C  | -2.07315804325257 | -2.10704869252964 | -1.26777616126457 |
| C  | -0.83170275853381 | -1.89270394604142 | -0.67750703428503 |
| C  | -0.83048375764924 | 1.05893186820004  | 0.81116477049726  |
| C  | -1.97393765263082 | 1.15665398611581  | 1.59745829980152  |
| C  | -3.21951980215484 | 1.33848040952419  | 0.98486624451824  |
| C  | -3.31417849357440 | 1.42239924645042  | -0.40581764749436 |
| C  | -2.16460927018035 | 1.32163056499411  | -1.19776094738432 |
| C  | -0.92718941637199 | 1.13973447833492  | -0.58897824926314 |
| C  | 1.27996776679877  | 2.13932376152573  | -0.69018706298640 |
| C  | 1.37315696668467  | 2.07064874837833  | 0.71375871735073  |
| C  | 2.14465094672235  | 2.99500709176787  | 1.41128019736284  |
| C  | 2.81932989276183  | 4.00189628454112  | 0.70667580617452  |
| C  | 2.72651294098021  | 4.07070801849646  | -0.68496684534585 |
| C  | 1.95804144728943  | 3.13321590993479  | -1.38938330970123 |
| C1 | 2.64206530036083  | -3.75266554489670 | 2.74213794369574  |
| C1 | 3.91440466223256  | -5.59496994367391 | -2.21483902798761 |
| C1 | 1.98965039956699  | -3.46264187322648 | -3.49879524084748 |

|    |                   |                   |                   |
|----|-------------------|-------------------|-------------------|
| H  | -1.66649175951138 | -2.32826687884765 | 2.60636668104354  |
| H  | -3.89469573689850 | -2.71864480439241 | 1.55211597658065  |
| H  | -4.15235316574555 | -2.56942748718516 | -0.91371698152741 |
| H  | -2.18478348095628 | -2.03915823523095 | -2.35193570755275 |
| H  | -1.89849903355434 | 1.08600947240569  | 2.68488455819251  |
| H  | -4.11917467384176 | 1.41325190356246  | 1.59682073232451  |
| H  | -4.28723086552815 | 1.56460031979914  | -0.87751273304741 |
| H  | -2.23691560829756 | 1.37904424332038  | -2.28620606425679 |
| H  | 2.21872642951798  | 2.93889776842155  | 2.49982357393854  |
| H  | 3.41699312667272  | 4.73566993369584  | 1.24940219774508  |
| H  | 3.25179963816079  | 4.85816359755833  | -1.22712349418825 |
| H  | 2.12811284039791  | -0.24906136255437 | -1.32966109949631 |
| H  | 0.32384498713669  | 1.12627088214131  | -2.37592448697521 |
| H  | 0.65439821514124  | 0.87978345264987  | 2.40159701634962  |
| H  | 0.35011797762714  | -1.59784780229459 | -2.48619565183974 |
| H  | 0.83941728325901  | -1.82813211463338 | 2.26685234458139  |
| C  | 1.25921755992090  | -0.35809271331366 | 0.67337366107896  |
| H  | 2.32269094572592  | -0.31282882074319 | 0.94826854198593  |
| H  | 1.88772572758349  | 3.18435544315984  | -2.47849780828403 |
| Cl | 4.24201835433658  | -5.73707214060277 | 0.89907503750915  |

8 E= -1527.213973635784 Hartree

|   |                   |                   |                   |
|---|-------------------|-------------------|-------------------|
| C | 1.15149535475999  | -0.29302210279254 | -0.88231661888360 |
| C | 0.48812254105051  | -1.61691119515027 | -1.40088356485414 |
| C | 0.76237507602294  | -1.74439653864023 | 1.18487401043080  |
| C | 0.60446486679524  | 0.90192917445500  | 1.30133721345201  |
| C | 0.43435098549818  | 1.03566825055176  | -1.28878810471622 |
| C | 1.59739280147971  | -2.76436047322439 | 0.44401445105015  |
| C | 2.46315051369502  | -3.70137561026732 | 1.01777408864082  |
| C | 3.17935731644147  | -4.60606908104983 | 0.18648143291863  |
| C | 3.02683561725547  | -4.54074291052546 | -1.21346388947491 |
| C | 2.15779895375699  | -3.57071764273622 | -1.78452230779264 |
| C | 1.44498523433747  | -2.69954374327383 | -0.95432503859014 |
| C | -0.65929671038518 | -1.98481656251337 | 0.72221782355461  |
| C | -1.74562049636704 | -2.29936985282603 | 1.53242002262181  |
| C | -2.99363786534020 | -2.52297850314689 | 0.94161297884970  |
| C | -3.14456852209391 | -2.43702805646793 | -0.44479856935006 |
| C | -2.04927925410151 | -2.13134022868912 | -1.25943219487208 |
| C | -0.80857564278436 | -1.90544457476931 | -0.67147299987006 |
| C | -0.81738745341914 | 1.04013569067507  | 0.80062903535653  |
| C | -1.96495942879416 | 1.12791926142056  | 1.58205224745240  |
| C | -3.20861888290060 | 1.30242234858883  | 0.96314537095438  |
| C | -3.29721442239981 | 1.38903950029232  | -0.42781960947361 |

|   |                   |                   |                   |
|---|-------------------|-------------------|-------------------|
| C | -2.14346846092876 | 1.29771860832435  | -1.21493340164673 |
| C | -0.90827279653079 | 1.12290590584542  | -0.59967296502235 |
| C | 1.29633716875062  | 2.13545744281932  | -0.69046857205817 |
| C | 1.38272514835331  | 2.06748532324711  | 0.71349860243794  |
| C | 2.14593736035756  | 2.99514134201376  | 1.41571529133132  |
| C | 2.81832591228779  | 4.00503273285304  | 0.71358916778247  |
| C | 2.73232370791109  | 4.07307299871366  | -0.67863536239772 |
| C | 1.97280868556103  | 3.13195751638657  | -1.38750341649190 |
| C | 2.61839111484858  | -3.74311611602145 | 2.43566214820187  |
| C | 3.74197474420112  | -5.44027234882979 | -2.05510187713353 |
| C | 2.00532927626889  | -3.47917968229676 | -3.20026184611393 |
| H | -1.62438167156860 | -2.36315295381580 | 2.61536595434095  |
| H | -3.85272414850715 | -2.76606489928288 | 1.56726371970977  |
| H | -4.12146233882517 | -2.61096414370963 | -0.89648209739543 |
| H | -2.16535631886324 | -2.06365234605761 | -2.34275134451983 |
| H | -1.89447380179742 | 1.05808683551603  | 2.66975873403576  |
| H | -4.11139171991218 | 1.37205797520659  | 1.57089366870810  |
| H | -4.26859566653298 | 1.52821622509704  | -0.90356278319433 |
| H | -2.21081392650465 | 1.35957121770088  | -2.30334867818364 |
| H | 2.21521740108609  | 2.93978969350982  | 2.50444235188508  |
| H | 3.40944451074242  | 4.74196037580881  | 1.25885556630238  |
| H | 3.25643690040213  | 4.86300999387223  | -1.21797092271039 |
| H | 2.15339594048100  | -0.25243346751213 | -1.33218353682918 |
| H | 0.35238393339087  | 1.11805041295162  | -2.38124676263063 |
| H | 0.66330584825874  | 0.87172682922909  | 2.39824937541928  |
| H | 0.36389698126145  | -1.59876948376541 | -2.49099816489931 |
| H | 0.87384677291512  | -1.83207730570140 | 2.27310726011480  |
| C | 1.28415216493154  | -0.35896997614640 | 0.67189378750188  |
| H | 2.34657514359124  | -0.30527077827946 | 0.94915406822353  |
| H | 1.90795040725485  | 3.18281933307917  | -2.47680046091427 |
| C | 4.04871334414917  | -5.57256360879802 | 0.76853750044430  |
| N | 4.75692152488189  | -6.35828586561844 | 1.25658241851347  |
| N | 2.71439782123518  | -3.74009177808901 | 3.59684362813927  |
| N | 4.32176198575533  | -6.17011982124134 | -2.75389629297937 |
| N | 1.85000346858686  | -3.36664533691974 | -4.34944653537582 |

9 E=-1379.534921842688 Hartree

|   |                  |                   |                   |
|---|------------------|-------------------|-------------------|
| C | 1.13867091972561 | -0.36493206142718 | -0.87880080470650 |
| C | 0.50124772534387 | -1.70338147373396 | -1.38435927938289 |
| C | 0.73358588574108 | -1.78881574311908 | 1.20003408250383  |
| C | 0.59813734643182 | 0.87141004540610  | 1.27685258049186  |
| C | 0.41984065503913 | 0.95749229127152  | -1.30151847370318 |
| C | 1.59111740691232 | -2.82390103582676 | 0.49256599142200  |

|   |                   |                   |                   |
|---|-------------------|-------------------|-------------------|
| C | 2.45346927773709  | -3.73922130533762 | 1.08828496026645  |
| C | 3.18583989616853  | -4.62377008524519 | 0.28377901345459  |
| C | 3.05769965476769  | -4.58113977511586 | -1.10607277516703 |
| C | 2.19585119430515  | -3.65291781246400 | -1.70782384642561 |
| C | 1.46242714394498  | -2.77996850662144 | -0.91009789771237 |
| C | -0.68302286598419 | -2.01600039291943 | 0.72369553192846  |
| C | -1.79226563690963 | -2.28663021326058 | 1.51843891542539  |
| C | -3.03701129847485 | -2.50289488326408 | 0.91617738703249  |
| C | -3.16399433116636 | -2.44685957775256 | -0.47333282815016 |
| C | -2.04761378155630 | -2.17699572451571 | -1.27318675416510 |
| C | -0.80931216539224 | -1.96409500905330 | -0.67560700121230 |
| C | -0.82467543620620 | 1.02062013152620  | 0.78633570300453  |
| C | -1.96639538771776 | 1.14676323164577  | 1.57065241302692  |
| C | -3.21118757813622 | 1.32962984347813  | 0.95601893750844  |
| C | -3.30628774593666 | 1.38142345012836  | -0.43606190508825 |
| C | -2.15780270363068 | 1.24925392330369  | -1.22583169470013 |
| C | -0.92041273744079 | 1.07120560721198  | -0.61547945687369 |
| C | 1.28749222717356  | 2.07066057841923  | -0.72981123653025 |
| C | 1.38792489003457  | 2.02634525586180  | 0.67202437630526  |
| C | 2.22052146550217  | 2.92152657112208  | 1.34961211441109  |
| C | 2.89765813196661  | 3.90951185578768  | 0.60253611346988  |
| C | 2.75479465409956  | 3.97933427901234  | -0.79475216951334 |
| C | 1.97249162333678  | 3.02356388210317  | -1.48353590607386 |
| H | 2.55307213094159  | -3.77171299960657 | 2.17591222141775  |
| H | 3.62843430271746  | -5.27342225736408 | -1.72681994272357 |
| H | 2.09628150264540  | -3.61651258541321 | -2.79528946530378 |
| H | -1.69150623712029 | -2.32224765631210 | 2.60565828362881  |
| H | -3.91067136766979 | -2.71241195633471 | 1.53456200977473  |
| H | -4.13705470276056 | -2.61078912115513 | -0.93806504658131 |
| H | -2.14711760679080 | -2.12559475345496 | -2.35987784818773 |
| N | 2.35642592720219  | 2.93683644569321  | 2.76177950477706  |
| N | 3.64998806948403  | 4.94313195002949  | 1.24237311713442  |
| N | 3.41940337386823  | 5.00711154134394  | -1.49200191230398 |
| H | 2.14370077517021  | -0.31683418387490 | -1.31968656628741 |
| H | 0.33870699696415  | 1.01266026337269  | -2.39474113936886 |
| H | 0.63602256506300  | 0.83740918349351  | 2.37622957905858  |
| H | 0.39022587788330  | -1.69652374072076 | -2.47777905813190 |
| H | 0.82078393733698  | -1.85456227910004 | 2.29452543604675  |
| C | 1.26148513840681  | -0.41139230788558 | 0.67736427275637  |
| H | 2.32436220338193  | -0.36177730249218 | 0.95462346572695  |
| N | 1.90768352566168  | 3.01830287010101  | -2.90183280925612 |
| H | 3.85621883354340  | -5.34940391894934 | 0.74704866290286  |
| H | 2.58888481084882  | 3.63063652232379  | -3.34270303877312 |
| H | 0.97834947990343  | 3.17438936608564  | -3.28812550332717 |
| H | 2.85546621784647  | 5.38261765817057  | -2.25616505310332 |



|   |                   |                  |                   |
|---|-------------------|------------------|-------------------|
| H | 3.66698666245491  | 5.75406559935943 | -0.83597809907636 |
| H | 4.66092121438261  | 4.79446619563738 | 1.20531235748666  |
| H | 3.36427438300180  | 5.05529078242614 | 2.21598060269173  |
| H | 3.33273954384717  | 2.95152011892508 | 3.05932377052778  |
| H | -1.89133775187013 | 1.09881852260900 | 2.65971783615031  |
| H | -2.23193007617312 | 1.27661289986012 | -2.31577353795592 |
| H | -4.27876779820370 | 1.52005401601747 | -0.91045013273049 |
| H | -4.10942722364018 | 1.42746518494383 | 1.56702733716914  |
| H | 1.88391586199435  | 2.15129259564995 | 3.20381460501466  |

10 E=-1953.189406650359 Hartree

|   |                   |                   |                   |
|---|-------------------|-------------------|-------------------|
| C | 1.15352785341669  | -0.31685668826896 | -0.88512111946983 |
| C | 0.52090069369743  | -1.64984593459271 | -1.41381252533947 |
| C | 0.77471963173852  | -1.77842931788287 | 1.17749246940061  |
| C | 0.60667665405105  | 0.87099027072563  | 1.30540128176552  |
| C | 0.41557928673852  | 1.00374846434150  | -1.28291620100282 |
| C | 1.62332227863307  | -2.79933371317589 | 0.44040853074679  |
| C | 2.49445064619669  | -3.71662010632157 | 1.00494480904697  |
| C | 3.23259704525745  | -4.58507710495075 | 0.18891776449621  |
| C | 3.09353354535596  | -4.51928183994491 | -1.19914546977151 |
| C | 2.21701068160595  | -3.58488950676998 | -1.76800701468940 |
| C | 1.48334140093826  | -2.73286096229564 | -0.95884718933926 |
| C | -0.64460998306846 | -1.99026885711379 | 0.70246681009923  |
| C | -1.75877435516576 | -2.20111147468821 | 1.49591232421014  |
| C | -3.02362862954003 | -2.33762420578588 | 0.91457483143441  |
| C | -3.16103950965046 | -2.25905093466778 | -0.47217428658580 |
| C | -2.03258066607375 | -2.04715328711769 | -1.27149950181309 |
| C | -0.78181694457856 | -1.91433768807729 | -0.69358359138375 |
| C | -0.82044242175969 | 1.00396358661304  | 0.81784488984164  |
| C | -1.96130032207060 | 1.09489865510619  | 1.61006262776638  |
| C | -3.21185305537546 | 1.26343632556564  | 1.00157881770347  |
| C | -3.31344344655798 | 1.34058895605672  | -0.38948304188727 |
| C | -2.16595476227297 | 1.24885093776715  | -1.18727623862749 |
| C | -0.92349147523854 | 1.08124840444147  | -0.58278140804005 |
| C | 1.26977751583806  | 2.11295897477499  | -0.69076134851288 |
| C | 1.37028420839057  | 2.04335454852044  | 0.71217130773404  |
| C | 2.13178746601425  | 2.97702538005172  | 1.40830007640009  |
| C | 2.78920764590778  | 3.99380429528196  | 0.70187092056977  |
| C | 2.68882407903373  | 4.06369913907472  | -0.68925683996712 |
| C | 1.93013889271629  | 3.11724060460995  | -1.39201540597013 |
| F | 2.65487553396536  | -3.79615278266378 | 2.34449041954523  |
| F | 3.80010391867582  | -5.35272162942993 | -1.97983866628044 |
| F | 2.10831213462556  | -3.53749753580652 | -3.11413204417238 |

|   |                   |                   |                   |
|---|-------------------|-------------------|-------------------|
| F | -1.65913824037687 | -2.23644186850285 | 2.84409499885853  |
| F | -4.11093605402472 | -2.51415371065017 | 1.68281389895681  |
| F | -4.37944220377618 | -2.36124449607793 | -1.02791981379338 |
| F | -2.19864477120893 | -1.93501800559509 | -2.60868713465463 |
| H | -1.88085366438239 | 1.03111322280273  | 2.69742625840510  |
| H | -4.10902939448344 | 1.33424580551719  | 1.61739202409274  |
| H | -4.28952723023560 | 1.47242934133481  | -0.85746115851398 |
| H | -2.24455269151517 | 1.30238664565697  | -2.27521993247848 |
| H | 2.21109706422028  | 2.92077576953234  | 2.49636211086062  |
| H | 3.37906114519275  | 4.73500245776219  | 1.24288789465274  |
| H | 3.20040344669853  | 4.85942759131372  | -1.23226257295853 |
| H | 2.15554010185160  | -0.25950322100006 | -1.33187131825310 |
| H | 0.32215138145950  | 1.08754401269191  | -2.37440155296629 |
| H | 0.67312809470469  | 0.84168441503963  | 2.40190782258894  |
| H | 0.39954269365492  | -1.63057825650244 | -2.50185410256910 |
| H | 0.86858627097699  | -1.86689439886654 | 2.26523315473334  |
| C | 1.28682340328079  | -0.38783696842086 | 0.67113740495576  |
| H | 2.34954669862804  | -0.33584329775443 | 0.94606434746598  |
| H | 1.85338794297814  | 3.16973250127167  | -2.48052764035946 |
| F | 4.07160546491233  | -5.48171951292974 | 0.73250932306858  |

11 E=-4853.203139665311 Hartree

|   |                   |                   |                   |
|---|-------------------|-------------------|-------------------|
| C | 1.16866220201341  | -0.29958342135496 | -0.88550212824376 |
| C | 0.54305826390183  | -1.63517144542534 | -1.41041762770964 |
| C | 0.78397232783871  | -1.76269541336255 | 1.16417082592645  |
| C | 0.62277770151687  | 0.88164651192267  | 1.30849122420935  |
| C | 0.41594388956917  | 1.01441993978198  | -1.27942924069144 |
| C | 1.63242321211311  | -2.78917058161766 | 0.43769088306608  |
| C | 2.49296355511751  | -3.71618803725210 | 1.01869443863550  |
| C | 3.22837215309109  | -4.59880164751992 | 0.20056981856640  |
| C | 3.09592415660237  | -4.53066729034615 | -1.19956541671161 |
| C | 2.22916878702103  | -3.57986800479765 | -1.77711269841876 |
| C | 1.50100089157712  | -2.72107999958089 | -0.95859888110453 |
| C | -0.63596040151954 | -1.96788556030201 | 0.69023923209061  |
| C | -1.75550357509360 | -2.16565771608611 | 1.49173366103728  |
| C | -3.02735789577893 | -2.28426386718942 | 0.90107477915071  |
| C | -3.15826737238921 | -2.21312775871156 | -0.49818735488818 |
| C | -2.01649783303816 | -2.02455955121918 | -1.29935720523282 |
| C | -0.76618964931447 | -1.89657953643749 | -0.70336926375962 |
| C | -0.80843095109946 | 1.00410234624610  | 0.82961912875790  |
| C | -1.94592475372549 | 1.07855605942840  | 1.62823583119332  |
| C | -3.20294553662459 | 1.21792305338291  | 1.02628576297778  |
| C | -3.31332890419034 | 1.29119384053935  | -0.36420419344221 |

|    |                   |                   |                   |
|----|-------------------|-------------------|-------------------|
| C  | -2.16826477367881 | 1.22625373227855  | -1.16771590469895 |
| C  | -0.91990556984397 | 1.07911853179779  | -0.57052761371492 |
| C  | 1.26522131365313  | 2.12929717104100  | -0.69119847383884 |
| C  | 1.37552385707586  | 2.05863592334853  | 0.71117166181573  |
| C  | 2.13501920508602  | 2.99695920863129  | 1.40322596558719  |
| C  | 2.78018131830768  | 4.01954695661052  | 0.69386651918671  |
| C  | 2.66992261830220  | 4.09054712716264  | -0.69645888898427 |
| C  | 1.91364027976775  | 3.13926211639180  | -1.39535992872578 |
| C1 | 2.65780297165201  | -3.78426072124840 | 2.74474312249682  |
| C1 | 3.98982504000958  | -5.61044005118222 | -2.20356878430273 |
| C1 | 2.06869484079891  | -3.48005472059496 | -3.50151689738517 |
| C1 | -1.59022872378559 | -2.19495053583414 | 3.21681602152754  |
| C1 | -4.42661338238863 | -2.46057569212525 | 1.89038218245638  |
| C1 | -4.71841038971673 | -2.30249894722200 | -1.22333044141806 |
| C1 | -2.17436661239624 | -1.88595784096390 | -3.02007787648368 |
| H  | -1.85880075175513 | 1.01556187868392  | 2.71485757430915  |
| H  | -4.09852318403582 | 1.26442243060114  | 1.64640832683012  |
| H  | -4.29463060731846 | 1.39605045570201  | -0.82774502146437 |
| H  | -2.25408088282149 | 1.27646075467056  | -2.25511438685336 |
| H  | 2.22191792436890  | 2.93976859986925  | 2.49064634197974  |
| H  | 3.36827651762865  | 4.76432909374402  | 1.23192990631327  |
| H  | 3.17206767950641  | 4.89073591162393  | -1.24175139583424 |
| H  | 2.16803157683102  | -0.23459857340984 | -1.33731141021846 |
| H  | 0.31415824363750  | 1.09620232555725  | -2.37008218187424 |
| H  | 0.69630636047535  | 0.84929290393592  | 2.40420813538896  |
| H  | 0.42541984404002  | -1.61727130451095 | -2.49763374262380 |
| H  | 0.87302303748996  | -1.85413568502715 | 2.25043396854398  |
| C  | 1.30365719172057  | -0.37345045827733 | 0.66749714446908  |
| H  | 2.36580286775887  | -0.32735592882993 | 0.94585519502437  |
| H  | 1.82920895664017  | 3.19236606501551  | -2.48326289236969 |
| C1 | 4.28504396540190  | -5.75999564753797 | 0.91295719945269  |

12 E=-1896.637982752867 Hartree

|   |                   |                   |                   |
|---|-------------------|-------------------|-------------------|
| C | 0.36495700000000  | -1.48449900000000 | 0.96509000000000  |
| C | -0.03458400000000 | -2.48853600000000 | -0.17809400000000 |
| C | -0.69432300000000 | -3.49426400000000 | 2.13572900000000  |
| C | -0.81287900000000 | -1.06063200000000 | 3.19071600000000  |
| C | -0.24737900000000 | -0.04926200000000 | 0.86090700000000  |
| C | 0.34837400000000  | -4.30855700000000 | 1.39945300000000  |
| C | 0.97968600000000  | -5.46170100000000 | 1.88079900000000  |
| C | 1.98131700000000  | -6.09136400000000 | 1.09424800000000  |
| C | 2.34077900000000  | -5.54465700000000 | -0.15628500000000 |
| C | 1.70096600000000  | -4.36559600000000 | -0.62399300000000 |

|   |                   |                   |                   |
|---|-------------------|-------------------|-------------------|
| C | 0.70766600000000  | -3.76379000000000 | 0.15738600000000  |
| C | -1.85649700000000 | -3.35071800000000 | 1.18277800000000  |
| C | -3.18932400000000 | -3.67347000000000 | 1.46011300000000  |
| C | -4.17938400000000 | -3.47682200000000 | 0.46507700000000  |
| C | -3.81672500000000 | -2.95895600000000 | -0.79584000000000 |
| C | -2.46450100000000 | -2.62566700000000 | -1.05801000000000 |
| C | -1.49995900000000 | -2.82361000000000 | -0.06403900000000 |
| C | -2.03824400000000 | -0.63701200000000 | 2.41294900000000  |
| C | -3.35952600000000 | -0.72182800000000 | 2.84281600000000  |
| C | -4.38585200000000 | -0.27766400000000 | 1.99895000000000  |
| C | -4.08442500000000 | 0.25241100000000  | 0.74141000000000  |
| C | -2.75313500000000 | 0.34847000000000  | 0.31427600000000  |
| C | -1.73328500000000 | -0.09822000000000 | 1.15017900000000  |
| C | 0.39701800000000  | 0.70512600000000  | 2.01239800000000  |
| C | 0.09584200000000  | 0.15464100000000  | 3.27175500000000  |
| C | 0.62287100000000  | 0.71758500000000  | 4.42969200000000  |
| C | 1.44975200000000  | 1.84430800000000  | 4.32820600000000  |
| C | 1.74876600000000  | 2.39052800000000  | 3.07810300000000  |
| C | 1.22588700000000  | 1.81801500000000  | 1.91108900000000  |
| C | 0.62734200000000  | -5.98435500000000 | 3.15996500000000  |
| C | 3.34938000000000  | -6.16778300000000 | -0.94585100000000 |
| C | 2.07413100000000  | -3.78492900000000 | -1.87196000000000 |
| C | -3.55008200000000 | -4.12560300000000 | 2.76201300000000  |
| C | -5.54515300000000 | -3.74677300000000 | 0.76100700000000  |
| C | -4.81393700000000 | -2.71007600000000 | -1.78029000000000 |
| C | -2.09301100000000 | -2.01709400000000 | -2.29139100000000 |
| H | -3.59457200000000 | -1.13733100000000 | 3.82437400000000  |
| H | -5.42384500000000 | -0.34529900000000 | 2.32635200000000  |
| H | -4.88756300000000 | 0.59579900000000  | 0.08906000000000  |
| H | -2.51828600000000 | 0.76486200000000  | -0.66702800000000 |
| H | 0.38758900000000  | 0.29112400000000  | 5.40658000000000  |
| H | 1.85748300000000  | 2.29863500000000  | 5.23143500000000  |
| H | 2.38903900000000  | 3.27049500000000  | 3.00842600000000  |
| H | 1.45426700000000  | -1.36949500000000 | 0.88942600000000  |
| H | -0.02257900000000 | 0.40252800000000  | -0.11439900000000 |
| H | -1.06043400000000 | -1.46589800000000 | 4.18020400000000  |
| H | 0.23202600000000  | -2.09592700000000 | -1.16638500000000 |
| H | -0.98535800000000 | -3.95106100000000 | 3.08843500000000  |
| C | 0.00003300000000  | -2.09963300000000 | 2.35264100000000  |
| H | 0.91982400000000  | -2.31139600000000 | 2.91540700000000  |
| H | 1.45864100000000  | 2.24466100000000  | 0.93396600000000  |
| C | 2.62599500000000  | -7.26799500000000 | 1.57250300000000  |
| N | 3.14811700000000  | -8.22882400000000 | 1.97356500000000  |
| N | 0.31534700000000  | -6.37340500000000 | 4.21278900000000  |
| N | 4.17394300000000  | -6.66823000000000 | -1.59878700000000 |

|   |                   |                   |                   |
|---|-------------------|-------------------|-------------------|
| N | 2.35460100000000  | -3.27460900000000 | -2.88094500000000 |
| N | -3.80052900000000 | -4.46695200000000 | 3.84731500000000  |
| N | -6.66101100000000 | -3.95862500000000 | 1.01931200000000  |
| N | -5.62310400000000 | -2.48902800000000 | -2.58857800000000 |
| N | -1.74601500000000 | -1.49466100000000 | -3.27327300000000 |

13 E=-1601.300489408853 Hartree

|   |                   |                   |                   |
|---|-------------------|-------------------|-------------------|
| C | 1.15482900000000  | -0.16266600000000 | -0.88100000000000 |
| C | 0.45229800000000  | -1.45064800000000 | -1.42550600000000 |
| C | 0.56072200000000  | -1.55718000000000 | 1.16410400000000  |
| C | 0.76150600000000  | 1.09056800000000  | 1.29968900000000  |
| C | 0.48859300000000  | 1.20253900000000  | -1.25187800000000 |
| C | 1.34772200000000  | -2.67007600000000 | 0.49204800000000  |
| C | 2.09101600000000  | -3.66446100000000 | 1.12046200000000  |
| C | 2.78052300000000  | -4.60714600000000 | 0.34455900000000  |
| C | 2.73134300000000  | -4.54255800000000 | -1.04941800000000 |
| C | 1.99040300000000  | -3.53511600000000 | -1.68386500000000 |
| C | 1.29775300000000  | -2.60504200000000 | -0.91501500000000 |
| C | -0.85035500000000 | -1.65855300000000 | 0.61888700000000  |
| C | -2.01342800000000 | -1.86230400000000 | 1.35613200000000  |
| C | -3.23383100000000 | -2.03149100000000 | 0.69066100000000  |
| C | -3.28778400000000 | -2.00175300000000 | -0.70474400000000 |
| C | -2.11832900000000 | -1.79730000000000 | -1.44709300000000 |
| C | -0.90650200000000 | -1.61696900000000 | -0.78557400000000 |
| C | -0.67697000000000 | 1.30080300000000  | 0.88346100000000  |
| C | -1.78995100000000 | 1.30753700000000  | 1.72394700000000  |
| C | -3.07318500000000 | 1.36219500000000  | 1.14778300000000  |
| C | -3.22080300000000 | 1.50022000000000  | -0.23886200000000 |
| C | -2.09443400000000 | 1.45650800000000  | -1.08399400000000 |
| C | -0.82672600000000 | 1.34880400000000  | -0.51283000000000 |
| C | 1.44434800000000  | 2.25973000000000  | -0.72356400000000 |
| C | 1.59543700000000  | 2.19605500000000  | 0.67395600000000  |
| C | 2.42528200000000  | 3.09864100000000  | 1.34216700000000  |
| C | 3.12390500000000  | 4.06588100000000  | 0.58840000000000  |
| C | 3.04971700000000  | 4.06403600000000  | -0.81237100000000 |
| C | 2.17626100000000  | 3.17836400000000  | -1.47880600000000 |
| H | 2.13200000000000  | -3.71257200000000 | 2.21134400000000  |
| H | 3.26845700000000  | -5.28001800000000 | -1.64774700000000 |
| H | 1.95173300000000  | -3.48302900000000 | -2.77467100000000 |
| H | -1.97458900000000 | -1.87656300000000 | 2.44726700000000  |
| H | -4.14660000000000 | -2.19078200000000 | 1.26621900000000  |
| H | -4.24135500000000 | -2.13659900000000 | -1.21622100000000 |
| H | -2.15051400000000 | -1.78783700000000 | -2.53987000000000 |

|   |                   |                   |                   |
|---|-------------------|-------------------|-------------------|
| N | -1.72240800000000 | 1.12699900000000  | 3.13624100000000  |
| N | -4.22365700000000 | 1.28172600000000  | 1.96125900000000  |
| N | -4.51636700000000 | 1.55891400000000  | -0.79405700000000 |
| N | -2.34420500000000 | 1.50998900000000  | -2.48533300000000 |
| N | 2.56420500000000  | 3.16490300000000  | 2.76138600000000  |
| N | 3.95709100000000  | 5.00321900000000  | 1.23910400000000  |
| N | 3.79851800000000  | 5.00703900000000  | -1.55070900000000 |
| H | 2.16353500000000  | -0.14996600000000 | -1.31744500000000 |
| H | 0.36212500000000  | 1.25871700000000  | -2.34405800000000 |
| H | 0.88700700000000  | 1.04148400000000  | 2.39258200000000  |
| H | 0.39620500000000  | -1.43226300000000 | -2.52366000000000 |
| H | 0.58749500000000  | -1.63531000000000 | 2.26084000000000  |
| C | 1.27116000000000  | -0.24808400000000 | 0.67364600000000  |
| H | 2.33065100000000  | -0.34743000000000 | 0.95053900000000  |
| N | 2.14967700000000  | 3.24935800000000  | -2.90386000000000 |
| H | 3.35523100000000  | -5.39533500000000 | 0.83338100000000  |
| H | -4.96239500000000 | 0.75018200000000  | 1.49472600000000  |
| H | -3.99323600000000 | 0.82745800000000  | 2.84807600000000  |
| H | -4.47841800000000 | 1.94603300000000  | -1.73940400000000 |
| H | -5.15093100000000 | 2.11602900000000  | -0.21939700000000 |
| H | -1.47939100000000 | 1.57050000000000  | -3.01879300000000 |
| H | -2.85016400000000 | 0.67517100000000  | -2.79908100000000 |
| H | -0.76475500000000 | 1.00386100000000  | 3.45853200000000  |
| H | -2.13163700000000 | 1.91434000000000  | 3.64469100000000  |
| H | 1.77323100000000  | 4.14137300000000  | -3.23463100000000 |
| H | 1.59490900000000  | 2.49975500000000  | -3.31235200000000 |
| H | 3.91513700000000  | 4.68403100000000  | -2.51407600000000 |
| H | 4.71649900000000  | 5.16731100000000  | -1.13159300000000 |
| H | 3.92470600000000  | 5.91626800000000  | 0.78118300000000  |
| H | 3.67148700000000  | 5.10237700000000  | 2.21642700000000  |
| H | 3.50980600000000  | 2.92643400000000  | 3.06958800000000  |
| H | 1.90731300000000  | 2.55041800000000  | 3.23779700000000  |

1·Ag<sup>+</sup> E=-6537.965087062790 Hartree

|   |                  |                   |                   |
|---|------------------|-------------------|-------------------|
| C | 1.09276606440241 | -0.29499452876853 | -0.88012540893628 |
| C | 0.47130537906783 | -1.63343248325558 | -1.41075360807199 |
| C | 0.72012864521894 | -1.75780481235963 | 1.18732330395240  |
| C | 0.58520915409291 | 0.91573928250174  | 1.31603856875931  |
| C | 0.38862058767216 | 1.04516609082513  | -1.28636283735905 |
| C | 1.58644493219041 | -2.78052389096738 | 0.45318047589254  |
| C | 2.46263766177378 | -3.70259430575596 | 1.03785078653041  |
| C | 3.20470578996255 | -4.56731418870193 | 0.20791537358783  |
| C | 3.06694364617774 | -4.50449324401463 | -1.18968853880014 |

|    |                   |                   |                   |
|----|-------------------|-------------------|-------------------|
| C  | 2.18570612448988  | -3.57453205873007 | -1.77836187060112 |
| C  | 1.44874619843744  | -2.71604218941712 | -0.95401124370227 |
| C  | -0.69204011323617 | -2.02696430780784 | 0.71351920639422  |
| C  | -1.77367453830557 | -2.41393590443478 | 1.51252126428419  |
| C  | -3.01338841638869 | -2.76085049073774 | 0.90562744877519  |
| C  | -3.15361072142546 | -2.68589377020584 | -0.51563200356489 |
| C  | -2.04862730795120 | -2.26534848673122 | -1.31304336580953 |
| C  | -0.82869331167634 | -1.95318196344913 | -0.70256656704138 |
| C  | -0.83694554032642 | 1.11519045077463  | 0.83515399844641  |
| C  | -1.96203217758545 | 1.32263196603674  | 1.64099607092854  |
| C  | -3.21671032147139 | 1.63670998377663  | 1.04033085186123  |
| C  | -3.32040751677353 | 1.71418712392467  | -0.38383409968775 |
| C  | -2.17199562227555 | 1.47435113049788  | -1.18977371159717 |
| C  | -0.94329392412787 | 1.19098010126872  | -0.58338745037560 |
| C  | 1.27032877771218  | 2.14523623630125  | -0.69625036614176 |
| C  | 1.37402543124157  | 2.07743338551588  | 0.71360899342179  |
| C  | 2.16039223635052  | 3.00170201734397  | 1.41169253665478  |
| C  | 2.84475288249697  | 4.00341176405845  | 0.69359608396373  |
| C  | 2.74081078256037  | 4.07176382014452  | -0.70665913624030 |
| C  | 1.95160398243017  | 3.13871306029427  | -1.40966924827347 |
| H  | -1.66326956813745 | -2.48936295138454 | 2.60237084436317  |
| H  | -3.82224609522455 | -3.18876041403759 | 1.51369264668941  |
| H  | -4.06313530213546 | -3.07016277310985 | -0.99830978427624 |
| H  | -2.15202988313656 | -2.22907158483828 | -2.40610661136365 |
| H  | -1.87920132707994 | 1.28601495174995  | 2.73565759984089  |
| H  | -4.06451917990621 | 1.94134592509568  | 1.66946090044463  |
| H  | -4.25291790569804 | 2.06537676618543  | -0.84672613982073 |
| H  | -2.25048049292943 | 1.55081845896291  | -2.28250265551243 |
| H  | 2.24335688312497  | 2.94787022832023  | 2.50647241970002  |
| H  | 3.45947158715327  | 4.73561574638856  | 1.23342345120843  |
| H  | 3.27438330300733  | 4.85731980673353  | -1.25743014894073 |
| H  | 2.10165592168410  | -0.24297745762812 | -1.32632875104397 |
| H  | 0.29349529025508  | 1.12733186935138  | -2.38393154848843 |
| H  | 0.65397002958727  | 0.88707171173164  | 2.41853655516861  |
| H  | 0.35427017004504  | -1.60898876111766 | -2.50889389399171 |
| H  | 0.81489227763271  | -1.83644910700925 | 2.28552481922884  |
| C  | 1.22601336287676  | -0.36491870348428 | 0.67843777606880  |
| H  | 2.29594578216541  | -0.32318792998408 | 0.95085786058255  |
| H  | 1.87246193922582  | 3.19144093002201  | -2.50489772759479 |
| H  | 2.07838196910773  | -3.52500022916208 | -2.87125902140282 |
| H  | 3.64667592008033  | -5.18414429679090 | -1.82775397143161 |
| H  | 3.89187206524106  | -5.29571121055947 | 0.65829326484794  |
| H  | 2.57111070027860  | -3.75194956414115 | 2.13052941069040  |
| Ag | -3.67260821195204 | -0.54583419922117 | 0.30167319778355  |

2·Ag<sup>+</sup> E=-6935.644279693110 Hartree

|   |                   |                   |                   |
|---|-------------------|-------------------|-------------------|
| C | 1.11450500000000  | -0.30198100000000 | -0.88341300000000 |
| C | 0.49194300000000  | -1.63759800000000 | -1.41538400000000 |
| C | 0.74001400000000  | -1.76220700000000 | 1.18432000000000  |
| C | 0.60968000000000  | 0.90673600000000  | 1.31513100000000  |
| C | 0.41034800000000  | 1.03751100000000  | -1.28812300000000 |
| C | 1.59984500000000  | -2.79062500000000 | 0.44983700000000  |
| C | 2.46981100000000  | -3.71740500000000 | 1.03574700000000  |
| C | 3.20684400000000  | -4.58646400000000 | 0.20558100000000  |
| C | 3.07051900000000  | -4.52263300000000 | -1.19208000000000 |
| C | 2.19544400000000  | -3.58740700000000 | -1.78200900000000 |
| C | 1.46331200000000  | -2.72538900000000 | -0.95751600000000 |
| C | -0.67216100000000 | -2.02508800000000 | 0.70580600000000  |
| C | -1.73646600000000 | -2.43720500000000 | 1.50586600000000  |
| C | -2.97295200000000 | -2.80620900000000 | 0.90242000000000  |
| C | -3.12061000000000 | -2.71843200000000 | -0.52151700000000 |
| C | -2.01209500000000 | -2.29135800000000 | -1.31840800000000 |
| C | -0.80811400000000 | -1.95221200000000 | -0.70361500000000 |
| C | -0.81276300000000 | 1.10503900000000  | 0.83607000000000  |
| C | -1.93655400000000 | 1.31606600000000  | 1.64462600000000  |
| C | -3.18899200000000 | 1.64181000000000  | 1.04570700000000  |
| C | -3.29570100000000 | 1.71796900000000  | -0.37977000000000 |
| C | -2.14927000000000 | 1.46883800000000  | -1.18899600000000 |
| C | -0.92042900000000 | 1.18102100000000  | -0.58316400000000 |
| C | 1.29048900000000  | 2.13888200000000  | -0.69744200000000 |
| C | 1.39549200000000  | 2.07039800000000  | 0.71210200000000  |
| C | 2.17928400000000  | 2.99636900000000  | 1.41079300000000  |
| C | 2.86023300000000  | 4.00035800000000  | 0.69273500000000  |
| C | 2.75511900000000  | 4.06940500000000  | -0.70744100000000 |
| C | 1.96809900000000  | 3.13485100000000  | -1.41088300000000 |
| H | 2.57714300000000  | -3.76765400000000 | 2.12839500000000  |
| H | 3.64640300000000  | -5.20588200000000 | -1.82969800000000 |
| H | 2.08904900000000  | -3.53737500000000 | -2.87487800000000 |
| F | -1.62558600000000 | -2.53077200000000 | 2.82685900000000  |
| F | -3.93517900000000 | -3.36533400000000 | 1.62439600000000  |
| F | -4.20555900000000 | -3.22935600000000 | -1.09722500000000 |
| F | -2.15940100000000 | -2.26150400000000 | -2.63848000000000 |
| H | -1.85269400000000 | 1.27757100000000  | 2.73917500000000  |
| H | -4.03711600000000 | 1.94384500000000  | 1.67540100000000  |
| H | -4.22626800000000 | 2.07756500000000  | -0.84034700000000 |
| H | -2.22933700000000 | 1.54591600000000  | -2.28161500000000 |
| H | 2.26297400000000  | 2.94209800000000  | 2.50544500000000  |
| H | 3.47312200000000  | 4.73396900000000  | 1.23266500000000  |
| H | 3.28597500000000  | 4.85696200000000  | -1.25789800000000 |



|    |                   |                   |                   |
|----|-------------------|-------------------|-------------------|
| H  | 2.12295800000000  | -0.25177800000000 | -1.33049900000000 |
| H  | 0.31339500000000  | 1.12059900000000  | -2.38533500000000 |
| H  | 0.67981700000000  | 0.87722100000000  | 2.41735700000000  |
| H  | 0.36866500000000  | -1.61439000000000 | -2.51116500000000 |
| H  | 0.82632800000000  | -1.84364000000000 | 2.28126000000000  |
| C  | 1.24876500000000  | -0.37271100000000 | 0.67560300000000  |
| H  | 2.31879800000000  | -0.33439100000000 | 0.94763800000000  |
| H  | 1.88793600000000  | 3.18847900000000  | -2.50594000000000 |
| H  | 3.88897100000000  | -5.31929900000000 | 0.65628500000000  |
| Ag | -3.62364000000000 | -0.52483400000000 | 0.25046600000000  |

3·Ag<sup>+</sup> E=-8385.658488809720 Hartree

|   |                   |                   |                   |
|---|-------------------|-------------------|-------------------|
| C | 1.14986300000000  | -0.31503000000000 | -0.88592800000000 |
| C | 0.55051600000000  | -1.65724000000000 | -1.42319500000000 |
| C | 0.77809100000000  | -1.78362900000000 | 1.17080700000000  |
| C | 0.63337700000000  | 0.87774800000000  | 1.31769300000000  |
| C | 0.41159900000000  | 1.00702700000000  | -1.28432700000000 |
| C | 1.64145800000000  | -2.81240800000000 | 0.44501700000000  |
| C | 2.50166800000000  | -3.74424600000000 | 1.03786600000000  |
| C | 3.24316600000000  | -4.61326900000000 | 0.21195600000000  |
| C | 3.11936800000000  | -4.54624100000000 | -1.18716600000000 |
| C | 2.25223100000000  | -3.60795300000000 | -1.78329300000000 |
| C | 1.51782600000000  | -2.74409400000000 | -0.96232500000000 |
| C | -0.63459500000000 | -2.03807400000000 | 0.68524100000000  |
| C | -1.73456000000000 | -2.37633900000000 | 1.48205900000000  |
| C | -2.98204600000000 | -2.71533500000000 | 0.86771700000000  |
| C | -3.10655900000000 | -2.64870100000000 | -0.56462500000000 |
| C | -1.98086100000000 | -2.24294300000000 | -1.35004800000000 |
| C | -0.75783400000000 | -1.97039500000000 | -0.72657900000000 |
| C | -0.79578800000000 | 1.06196200000000  | 0.85112400000000  |
| C | -1.90788400000000 | 1.28899000000000  | 1.67059300000000  |
| C | -3.16030600000000 | 1.63597400000000  | 1.08394400000000  |
| C | -3.28174400000000 | 1.70597300000000  | -0.34185200000000 |
| C | -2.14913800000000 | 1.42812400000000  | -1.16197600000000 |
| C | -0.91674400000000 | 1.13221000000000  | -0.56763800000000 |
| C | 1.27512800000000  | 2.12510800000000  | -0.69919000000000 |
| C | 1.39532700000000  | 2.05507600000000  | 0.70932700000000  |
| C | 2.16826200000000  | 2.99412800000000  | 1.40245500000000  |
| C | 2.82275500000000  | 4.01278100000000  | 0.68036200000000  |
| C | 2.70210100000000  | 4.08350800000000  | -0.71844700000000 |
| C | 1.92615600000000  | 3.13567500000000  | -1.41654100000000 |
| H | 2.59755000000000  | -3.79786500000000 | 2.13135100000000  |
| H | 3.69874700000000  | -5.23036400000000 | -1.82070000000000 |

|    |                   |                   |                   |
|----|-------------------|-------------------|-------------------|
| H  | 2.15342000000000  | -3.55619800000000 | -2.87672400000000 |
| Cl | -1.61225200000000 | -2.37063000000000 | 3.21153700000000  |
| Cl | -4.28999200000000 | -3.34485200000000 | 1.82613500000000  |
| Cl | -4.56364400000000 | -3.20209300000000 | -1.33662100000000 |
| Cl | -2.15738100000000 | -2.08141100000000 | -3.06721300000000 |
| H  | -1.81240200000000 | 1.25324200000000  | 2.76385400000000  |
| H  | -3.99145100000000 | 1.96748500000000  | 1.72170800000000  |
| H  | -4.20612900000000 | 2.09040800000000  | -0.79517800000000 |
| H  | -2.23930300000000 | 1.49884900000000  | -2.25421300000000 |
| H  | 2.26366100000000  | 2.93890500000000  | 2.49606100000000  |
| H  | 3.42694600000000  | 4.75664600000000  | 1.21610300000000  |
| H  | 3.21211700000000  | 4.88264200000000  | -1.27192800000000 |
| H  | 2.15617400000000  | -0.24183100000000 | -1.33493300000000 |
| H  | 0.30334200000000  | 1.08766100000000  | -2.38043300000000 |
| H  | 0.71274400000000  | 0.84693200000000  | 2.41898000000000  |
| H  | 0.43373700000000  | -1.63148000000000 | -2.51873500000000 |
| H  | 0.85457500000000  | -1.86690100000000 | 2.26748400000000  |
| C  | 1.28482400000000  | -0.39065100000000 | 0.67109300000000  |
| H  | 2.35397000000000  | -0.34900500000000 | 0.94609900000000  |
| H  | 1.83374100000000  | 3.19052600000000  | -2.51054400000000 |
| H  | 3.91887300000000  | -5.34956700000000 | 0.66668700000000  |
| Ag | -3.71439800000000 | -0.50045800000000 | 0.31319100000000  |

4·Ag<sup>+</sup> E=-6907.359093339177 Hartree

|   |                   |                   |                   |
|---|-------------------|-------------------|-------------------|
| C | 0.36998100000000  | -1.46815200000000 | 0.98029500000000  |
| C | -0.01982500000000 | -2.46932400000000 | -0.15966100000000 |
| C | -0.66327400000000 | -3.48732900000000 | 2.16384300000000  |
| C | -0.83173700000000 | -1.03536800000000 | 3.19623300000000  |
| C | -0.20573000000000 | -0.01749900000000 | 0.87081400000000  |
| C | 0.37306600000000  | -4.31929300000000 | 1.40874000000000  |
| C | 0.96454300000000  | -5.50750300000000 | 1.85409600000000  |
| C | 1.91957200000000  | -6.14113200000000 | 1.03448100000000  |
| C | 2.26629500000000  | -5.59282800000000 | -0.21408600000000 |
| C | 1.66375600000000  | -4.40204400000000 | -0.66605200000000 |
| C | 0.72165700000000  | -3.76812600000000 | 0.15301800000000  |
| C | -1.82649000000000 | -3.39505200000000 | 1.20752300000000  |
| C | -3.13605700000000 | -3.84361200000000 | 1.45511200000000  |
| C | -4.11577400000000 | -3.81290500000000 | 0.39924100000000  |
| C | -3.75900100000000 | -3.25885800000000 | -0.88121300000000 |
| C | -2.43097000000000 | -2.74054900000000 | -1.08187800000000 |
| C | -1.47679200000000 | -2.84479200000000 | -0.05421600000000 |
| C | -2.03685100000000 | -0.54885200000000 | 2.41727700000000  |
| C | -3.35316200000000 | -0.48636400000000 | 2.89013400000000  |

|    |                   |                   |                   |
|----|-------------------|-------------------|-------------------|
| C  | -4.34772100000000 | 0.18382700000000  | 2.12074600000000  |
| C  | -4.00526400000000 | 0.74110900000000  | 0.84483300000000  |
| C  | -2.67176700000000 | 0.61894600000000  | 0.35488300000000  |
| C  | -1.69549500000000 | 0.00422900000000  | 1.14819200000000  |
| C  | 0.42126000000000  | 0.73619700000000  | 2.04377700000000  |
| C  | 0.08313300000000  | 0.18483700000000  | 3.30217300000000  |
| C  | 0.58643300000000  | 0.74634300000000  | 4.48123400000000  |
| C  | 1.43544300000000  | 1.86841700000000  | 4.39776000000000  |
| C  | 1.77169900000000  | 2.41582100000000  | 3.14739400000000  |
| C  | 1.26440600000000  | 1.85026700000000  | 1.96029600000000  |
| H  | 0.69050700000000  | -5.93611300000000 | 2.82710900000000  |
| H  | 3.00806200000000  | -6.09879400000000 | -0.84538300000000 |
| H  | 1.92962100000000  | -3.97834100000000 | -1.64324900000000 |
| C  | -3.50937800000000 | -4.27749700000000 | 2.76425300000000  |
| C  | -5.42130500000000 | -4.36897700000000 | 0.60549200000000  |
| C  | -4.71057300000000 | -3.25131100000000 | -1.95306900000000 |
| C  | -2.09981000000000 | -2.07395400000000 | -2.30163600000000 |
| H  | -3.61306800000000 | -0.89515100000000 | 3.87513800000000  |
| H  | -5.33565800000000 | 0.38424300000000  | 2.55894100000000  |
| H  | -4.72929300000000 | 1.37066400000000  | 0.30852100000000  |
| H  | -2.40685400000000 | 1.06327200000000  | -0.61332800000000 |
| H  | 0.32248900000000  | 0.32069600000000  | 5.45886500000000  |
| H  | 1.83192900000000  | 2.31897600000000  | 5.31625400000000  |
| H  | 2.42881200000000  | 3.29333400000000  | 3.09332900000000  |
| H  | 1.46715800000000  | -1.36629600000000 | 0.91376100000000  |
| H  | 0.04519800000000  | 0.43627200000000  | -0.10436400000000 |
| H  | -1.10856800000000 | -1.44165300000000 | 4.18425100000000  |
| H  | 0.23607200000000  | -2.06380300000000 | -1.15345000000000 |
| H  | -0.94958400000000 | -3.94133400000000 | 3.12738400000000  |
| C  | -0.00956500000000 | -2.07877000000000 | 2.36917400000000  |
| H  | 0.91141100000000  | -2.26911000000000 | 2.94866400000000  |
| H  | 1.52608900000000  | 2.27944200000000  | 0.98392800000000  |
| H  | 2.39075400000000  | -7.07274700000000 | 1.37154800000000  |
| N  | -3.79164900000000 | -4.57668400000000 | 3.86340100000000  |
| N  | -6.49678300000000 | -4.80302900000000 | 0.78669100000000  |
| N  | -5.49577300000000 | -3.22091200000000 | -2.82503300000000 |
| N  | -1.80645400000000 | -1.47565000000000 | -3.26774300000000 |
| Ag | -4.71242600000000 | -1.45995000000000 | 0.47783400000000  |

5·Ag<sup>+</sup> E=-6759.730923687140 Hartree

|   |                  |                   |                   |
|---|------------------|-------------------|-------------------|
| C | 1.12928465453013 | -0.29777049142563 | -0.88747749068068 |
| C | 0.50593908897199 | -1.63310622908383 | -1.42240906147950 |
| C | 0.70872325782646 | -1.74472267344592 | 1.17916810391391  |

|   |                   |                   |                   |
|---|-------------------|-------------------|-------------------|
| C | 0.63935368499426  | 0.92716685042288  | 1.30088351198095  |
| C | 0.42690795702346  | 1.04312417146192  | -1.28247999976864 |
| C | 1.56958510068037  | -2.78680889449153 | 0.46694520165106  |
| C | 2.42041561825805  | -3.71983048851993 | 1.07135848682684  |
| C | 3.16461170526708  | -4.60020211035077 | 0.25988013597183  |
| C | 3.05545703613401  | -4.54061070174962 | -1.14029768554974 |
| C | 2.20075486801587  | -3.59887337108467 | -1.74902706009238 |
| C | 1.46064692017138  | -2.72569156588381 | -0.94307041510387 |
| C | -0.69983656443017 | -1.98649666698694 | 0.68229711663831  |
| C | -1.80492827333088 | -2.33841526312444 | 1.46502146767209  |
| C | -3.04451244439403 | -2.66221260412892 | 0.83623196591530  |
| C | -3.15005615003771 | -2.60992527001761 | -0.58803024804394 |
| C | -2.02205139911626 | -2.23082779223615 | -1.36823762521030 |
| C | -0.80987215216622 | -1.92988033666527 | -0.73715505197491 |
| C | -0.79042338033121 | 1.16394215374187  | 0.84006114306531  |
| C | -1.87101936004797 | 1.49511578463923  | 1.67669504306013  |
| C | -3.11236486299587 | 1.90958073339919  | 1.06721289052203  |
| C | -3.29059965909548 | 1.78738560080162  | -0.35952444445071 |
| C | -2.13552304919714 | 1.51058257124045  | -1.19249807175849 |
| C | -0.91104696780526 | 1.20369953660441  | -0.57521431509787 |
| C | 1.32979307747217  | 2.13555769998459  | -0.71227573267438 |
| C | 1.44877042682524  | 2.07147505971171  | 0.69689039719185  |
| C | 2.25765395596217  | 2.98556367037469  | 1.38149991698023  |
| C | 2.94581193460390  | 3.97857303304600  | 0.65379739204363  |
| C | 2.82739119637002  | 4.04325073261788  | -0.74493359678899 |
| C | 2.02025838905736  | 3.11499468400567  | -1.43529010940830 |
| H | 2.50726315296668  | -3.76585250570941 | 2.16627609948138  |
| H | 3.63658526735597  | -5.23186121684597 | -1.76461043000158 |
| H | 2.11573895309170  | -3.55177047576669 | -2.84412977935137 |
| H | -1.71552969294446 | -2.40837476533380 | 2.55733345464012  |
| H | -3.87391909686392 | -3.06692737800247 | 1.43242125033235  |
| H | -4.06867988895598 | -2.95459735483110 | -1.08152525657499 |
| H | -2.10412503801243 | -2.20293422655728 | -2.46307332143566 |
| N | -1.79662533884088 | 1.63813922770962  | 3.07877061016548  |
| N | -4.11121121981202 | 2.48830024076950  | 1.84649900697258  |
| N | -4.45366014823933 | 2.30563030717535  | -0.96336849518003 |
| N | -2.34423077050867 | 1.54765147222030  | -2.57952221258533 |
| H | 2.35711820540339  | 2.93123214463787  | 2.47529840986566  |
| H | 3.57684825831824  | 4.70372873642929  | 1.18447425474745  |
| H | 3.36591712816703  | 4.81915906218560  | -1.30471916403743 |
| H | 2.14178678919605  | -0.25067092618602 | -1.32686139230685 |
| H | 0.35209161028642  | 1.12429957955183  | -2.38263182360926 |
| H | 0.73713608686280  | 0.88704499141095  | 2.40139512728561  |
| H | 0.40923254825437  | -1.61392466764959 | -2.52292284575124 |
| H | 0.78253042065399  | -1.81952340096637 | 2.27963221973472  |

|    |                   |                   |                   |
|----|-------------------|-------------------|-------------------|
| C  | 1.25261008888015  | -0.36673105989874 | 0.67128894082295  |
| H  | 2.32264170286834  | -0.35358656994196 | 0.94755258983971  |
| H  | 1.93585970332275  | 3.16185707011078  | -2.53087260108420 |
| H  | 3.83076200563220  | -5.33789505493375 | 0.72651119315771  |
| H  | -4.58212719975134 | 3.27983796900956  | 1.39560824691475  |
| H  | -3.75568392900263 | 2.73906421705964  | 2.77662965734832  |
| H  | -4.60979676043377 | 1.93726125904570  | -1.90663526704501 |
| H  | -5.30261927836916 | 2.22194182122976  | -0.39895009003950 |
| H  | -1.53209104586526 | 1.27669181090035  | -3.13525821152354 |
| H  | -2.72815135151974 | 2.43692854022331  | -2.91880851441219 |
| H  | -0.85114466801333 | 1.66437094306361  | 3.46169190898523  |
| H  | -2.39364534281051 | 1.00647556373229  | 3.62079669475181  |
| Ag | -3.53030676053239 | -0.43329417669924 | 0.32735587454156  |

6·Ag<sup>+</sup> E=-6935.658494946133 Hartree

|   |                   |                   |                   |
|---|-------------------|-------------------|-------------------|
| C | 1.10475297372819  | -0.30410675524873 | -0.88232713914665 |
| C | 0.48518426584266  | -1.64286366756424 | -1.41372393008292 |
| C | 0.73556115697632  | -1.76734107922681 | 1.18687580113339  |
| C | 0.59252552645746  | 0.90374556737044  | 1.31464883799176  |
| C | 0.39697153842244  | 1.03338691128142  | -1.28850216019505 |
| C | 1.59726582843851  | -2.78471462891542 | 0.44995359539453  |
| C | 2.46417112822907  | -3.70571927232117 | 1.03470269894822  |
| C | 3.20471655557871  | -4.57783325109195 | 0.20740639285703  |
| C | 3.06616597141379  | -4.51455651123860 | -1.19173117692488 |
| C | 2.18631191078641  | -3.57803960100072 | -1.77715927350559 |
| C | 1.45891840636722  | -2.72084577685357 | -0.95374066399871 |
| C | -0.67738445178285 | -2.03902798655380 | 0.71230276496495  |
| C | -1.75786144715823 | -2.42501129147285 | 1.51266797186741  |
| C | -2.99790519254920 | -2.77081520349841 | 0.90577394011397  |
| C | -3.13897894466924 | -2.69560610806550 | -0.51520833502216 |
| C | -2.03459178948708 | -2.27594039323086 | -1.31402987411541 |
| C | -0.81480386209477 | -1.96501614631155 | -0.70349000311429 |
| C | -0.82972119483951 | 1.10065667690454  | 0.83264818252976  |
| C | -1.95491752762606 | 1.30965006809427  | 1.63817912685512  |
| C | -3.20873111802181 | 1.62637343410347  | 1.03691255835171  |
| C | -3.31167932350818 | 1.70414355713799  | -0.38734934484525 |
| C | -2.16355539788885 | 1.46196502420857  | -1.19287717131501 |
| C | -0.93545922258665 | 1.17673375771375  | -0.58585266910013 |
| C | 1.27642720450828  | 2.13507811276259  | -0.69734744942433 |
| C | 1.37939253772772  | 2.06729488577017  | 0.71253267025794  |
| C | 2.16346306761917  | 2.99284765088382  | 1.41147365726181  |
| C | 2.84614532009843  | 3.99595523696766  | 0.69372804640262  |
| C | 2.74293332359083  | 4.06429316463719  | -0.70660529775455 |

|    |                   |                   |                   |
|----|-------------------|-------------------|-------------------|
| C  | 1.95609825914183  | 3.12986993609668  | -1.41045165711463 |
| F  | 2.61086897295821  | -3.77787175805022 | 2.35837376945831  |
| F  | 3.76426952579819  | -5.34112414947943 | -1.95819122790902 |
| F  | 2.07014995159105  | -3.53143243040929 | -3.10484972276102 |
| H  | -1.64662518776237 | -2.50088455256122 | 2.60234577780955  |
| H  | -3.80658322512786 | -3.19844886410908 | 1.51431462979764  |
| H  | -4.04879886953413 | -3.07987487687631 | -0.99742429379977 |
| H  | -2.13841307273862 | -2.24003676793001 | -2.40701096596803 |
| H  | -1.87252341148758 | 1.27382099402663  | 2.73290546366048  |
| H  | -4.05604422208740 | 1.93299188483820  | 1.66577136826675  |
| H  | -4.24341074949448 | 2.05685065799233  | -0.85064676255935 |
| H  | -2.24135620264805 | 1.53944862444027  | -2.28558180677272 |
| H  | 2.24602166797067  | 2.93905696895178  | 2.50624590402634  |
| H  | 3.45905924846549  | 4.72930789951939  | 1.23398253970164  |
| H  | 3.27527406031668  | 4.85098754449480  | -1.25687858937826 |
| H  | 2.11328390602440  | -0.24945435399471 | -1.32902699294513 |
| H  | 0.30264315424916  | 1.11507062096307  | -2.38608948587041 |
| H  | 0.66114476757910  | 0.87456131740242  | 2.41705698989774  |
| H  | 0.37329155085214  | -1.62643714199204 | -2.51107047032629 |
| H  | 0.83619896787857  | -1.85364900492424 | 2.28248287077253  |
| C  | 1.23816501244068  | -0.37383765653016 | 0.67717854943687  |
| H  | 2.30767906526560  | -0.32843342686554 | 0.95047641276074  |
| H  | 1.87765480136417  | 3.18265262323507  | -2.50568842268035 |
| F  | 4.03193810673491  | -5.46353344314516 | 0.74542118922540  |
| Ag | -3.66523232132316 | -0.55685102033494 | 0.30110217688570  |

7·Ag<sup>+</sup> E=-8385.664734103779 Hartree

|   |                   |                   |                   |
|---|-------------------|-------------------|-------------------|
| C | 1.09254100000000  | -0.29519300000000 | -0.88055200000000 |
| C | 0.46736600000000  | -1.63199800000000 | -1.40858500000000 |
| C | 0.71509200000000  | -1.75626500000000 | 1.18510700000000  |
| C | 0.58604400000000  | 0.91357200000000  | 1.31640200000000  |
| C | 0.38683700000000  | 1.04313500000000  | -1.28698300000000 |
| C | 1.58009500000000  | -2.77711400000000 | 0.45185800000000  |
| C | 2.45797100000000  | -3.69719800000000 | 1.03782700000000  |
| C | 3.21054600000000  | -4.57282200000000 | 0.21335500000000  |
| C | 3.07308300000000  | -4.50792100000000 | -1.19620400000000 |
| C | 2.18483400000000  | -3.56674000000000 | -1.77736900000000 |
| C | 1.44404600000000  | -2.71220100000000 | -0.95154100000000 |
| C | -0.69710100000000 | -2.02754800000000 | 0.71217100000000  |
| C | -1.77670900000000 | -2.41552500000000 | 1.51301300000000  |
| C | -3.01618700000000 | -2.76026400000000 | 0.90435500000000  |
| C | -3.15608800000000 | -2.68493000000000 | -0.51699400000000 |
| C | -2.05138600000000 | -2.26659700000000 | -1.31574800000000 |

|    |                   |                   |                   |
|----|-------------------|-------------------|-------------------|
| C  | -0.83325200000000 | -1.95402000000000 | -0.70243400000000 |
| C  | -0.83658100000000 | 1.11291700000000  | 0.83632300000000  |
| C  | -1.96055400000000 | 1.32170100000000  | 1.64351800000000  |
| C  | -3.21514300000000 | 1.63841200000000  | 1.04411400000000  |
| C  | -3.32026200000000 | 1.71617800000000  | -0.38001500000000 |
| C  | -2.17328900000000 | 1.47371100000000  | -1.18733500000000 |
| C  | -0.94433300000000 | 1.18860100000000  | -0.58206900000000 |
| C  | 1.26992000000000  | 2.14261700000000  | -0.69721300000000 |
| C  | 1.37518500000000  | 2.07463200000000  | 0.71251500000000  |
| C  | 2.16368400000000  | 2.99757900000000  | 1.40991600000000  |
| C  | 2.84826600000000  | 3.99838200000000  | 0.69076700000000  |
| C  | 2.74269900000000  | 4.06694600000000  | -0.70937800000000 |
| C  | 1.95162600000000  | 3.13498400000000  | -1.41172800000000 |
| Cl | 2.62893100000000  | -3.76384200000000 | 2.76870000000000  |
| Cl | 3.98401100000000  | -5.57467600000000 | -2.20221300000000 |
| Cl | 2.02134800000000  | -3.47367300000000 | -3.50735500000000 |
| H  | -1.66462900000000 | -2.49394200000000 | 2.60233500000000  |
| H  | -3.82573100000000 | -3.18793600000000 | 1.51170900000000  |
| H  | -4.06632500000000 | -3.06808200000000 | -0.99924500000000 |
| H  | -2.15265000000000 | -2.23315000000000 | -2.40894200000000 |
| H  | -1.87654900000000 | 1.28536900000000  | 2.73809600000000  |
| H  | -4.06162500000000 | 1.94476500000000  | 1.67421400000000  |
| H  | -4.25236300000000 | 2.06982300000000  | -0.84190400000000 |
| H  | -2.25274200000000 | 1.55066400000000  | -2.27995300000000 |
| H  | 2.24840000000000  | 2.94331700000000  | 2.50447900000000  |
| H  | 3.46479100000000  | 4.72960500000000  | 1.22979100000000  |
| H  | 3.27679100000000  | 4.85169100000000  | -1.26072900000000 |
| H  | 2.09964400000000  | -0.24423100000000 | -1.33101200000000 |
| H  | 0.29123200000000  | 1.12420000000000  | -2.38441200000000 |
| H  | 0.65649200000000  | 0.88386800000000  | 2.41858500000000  |
| H  | 0.36063800000000  | -1.62010800000000 | -2.50589700000000 |
| H  | 0.81923100000000  | -1.84654200000000 | 2.27893800000000  |
| C  | 1.22638400000000  | -0.36562700000000 | 0.67747700000000  |
| H  | 2.29557500000000  | -0.32678800000000 | 0.95331300000000  |
| H  | 1.87171100000000  | 3.18751000000000  | -2.50685300000000 |
| Cl | 4.28950900000000  | -5.71606900000000 | 0.92573500000000  |
| Ag | -3.67667000000000 | -0.54352600000000 | 0.30356000000000  |

8·Ag<sup>+</sup> E=-6907.372112260877 Hartree

|   |                  |                   |                   |
|---|------------------|-------------------|-------------------|
| C | 1.10943200000000 | -0.31339200000000 | -0.88467300000000 |
| C | 0.47925800000000 | -1.65158000000000 | -1.41430000000000 |
| C | 0.73713600000000 | -1.77748400000000 | 1.18492000000000  |
| C | 0.59576800000000 | 0.89077800000000  | 1.31259100000000  |

|   |                   |                   |                   |
|---|-------------------|-------------------|-------------------|
| C | 0.39986500000000  | 1.02150200000000  | -1.29222200000000 |
| C | 1.59951300000000  | -2.78974800000000 | 0.44368000000000  |
| C | 2.48150400000000  | -3.71504900000000 | 1.03345900000000  |
| C | 3.23557600000000  | -4.59709400000000 | 0.20012600000000  |
| C | 3.09312300000000  | -4.53123300000000 | -1.21209000000000 |
| C | 2.19646000000000  | -3.58322900000000 | -1.79345300000000 |
| C | 1.45817900000000  | -2.72469400000000 | -0.95697500000000 |
| C | -0.67710500000000 | -2.05157500000000 | 0.71343200000000  |
| C | -1.75311000000000 | -2.43650000000000 | 1.52021600000000  |
| C | -2.99595500000000 | -2.77295500000000 | 0.91539800000000  |
| C | -3.14154600000000 | -2.69641600000000 | -0.50484400000000 |
| C | -2.03904100000000 | -2.28476100000000 | -1.30963800000000 |
| C | -0.81846200000000 | -1.97635300000000 | -0.69935800000000 |
| C | -0.82718400000000 | 1.08662700000000  | 0.82946600000000  |
| C | -1.95107900000000 | 1.30143500000000  | 1.63580700000000  |
| C | -3.20241400000000 | 1.62879200000000  | 1.03432700000000  |
| C | -3.30503900000000 | 1.70756100000000  | -0.38996500000000 |
| C | -2.15946200000000 | 1.45578000000000  | -1.19613200000000 |
| C | -0.93292800000000 | 1.16380800000000  | -0.58861300000000 |
| C | 1.28054500000000  | 2.12239400000000  | -0.70003100000000 |
| C | 1.38330700000000  | 2.05439500000000  | 0.70983100000000  |
| C | 2.16785000000000  | 2.97880200000000  | 1.40972800000000  |
| C | 2.85033700000000  | 3.98169200000000  | 0.69137700000000  |
| C | 2.74729300000000  | 4.05023700000000  | -0.70903700000000 |
| C | 1.96066700000000  | 3.11632500000000  | -1.41387200000000 |
| C | 2.60095500000000  | -3.75767200000000 | 2.45976200000000  |
| C | 3.84081800000000  | -5.41216400000000 | -2.05444900000000 |
| C | 2.03006200000000  | -3.49220000000000 | -3.21261600000000 |
| H | -1.63654800000000 | -2.51747200000000 | 2.60883400000000  |
| H | -3.80550600000000 | -3.19549100000000 | 1.52639200000000  |
| H | -4.05501500000000 | -3.07642600000000 | -0.98375800000000 |
| H | -2.14443300000000 | -2.25260100000000 | -2.40246700000000 |
| H | -1.86878000000000 | 1.26700200000000  | 2.73059700000000  |
| H | -4.04655400000000 | 1.94351100000000  | 1.66357700000000  |
| H | -4.23407700000000 | 2.06752700000000  | -0.85316200000000 |
| H | -2.23689000000000 | 1.53556500000000  | -2.28869000000000 |
| H | 2.25111300000000  | 2.92494200000000  | 2.50431900000000  |
| H | 3.46357100000000  | 4.71468100000000  | 1.23154800000000  |
| H | 3.28009700000000  | 4.83669200000000  | -1.25899900000000 |
| H | 2.11585300000000  | -0.25930000000000 | -1.33666300000000 |
| H | 0.30718800000000  | 1.10208600000000  | -2.38976800000000 |
| H | 0.66581400000000  | 0.86027600000000  | 2.41460900000000  |
| H | 0.36492700000000  | -1.63361100000000 | -2.51172800000000 |
| H | 0.84298500000000  | -1.86401000000000 | 2.28005800000000  |
| C | 1.24476800000000  | -0.38303200000000 | 0.67311400000000  |



|    |                   |                   |                   |
|----|-------------------|-------------------|-------------------|
| H  | 2.31365700000000  | -0.33587300000000 | 0.94919800000000  |
| H  | 1.88309100000000  | 3.16929400000000  | -2.50904400000000 |
| C  | 4.12751800000000  | -5.54481300000000 | 0.79207200000000  |
| N  | 4.85525900000000  | -6.31814500000000 | 1.29064500000000  |
| N  | 2.64484700000000  | -3.73736100000000 | 3.63230700000000  |
| N  | 4.44763700000000  | -6.12988400000000 | -2.75651100000000 |
| N  | 1.84080800000000  | -3.36200100000000 | -4.36340300000000 |
| Ag | -3.67370700000000 | -0.55367200000000 | 0.30597700000000  |

9·Ag<sup>+</sup> E=-6759.722250986202 Hartree

|   |                   |                   |                   |
|---|-------------------|-------------------|-------------------|
| C | 1.11791800000000  | -0.37734600000000 | -0.85738700000000 |
| C | 0.53020300000000  | -1.72428000000000 | -1.40392400000000 |
| C | 0.67939500000000  | -1.83176600000000 | 1.20210400000000  |
| C | 0.62315600000000  | 0.84890200000000  | 1.32456500000000  |
| C | 0.39236200000000  | 0.94585600000000  | -1.26985400000000 |
| C | 1.56302500000000  | -2.86725700000000 | 0.50925600000000  |
| C | 2.40879900000000  | -3.79240000000000 | 1.13295200000000  |
| C | 3.18171200000000  | -4.66346600000000 | 0.33841000000000  |
| C | 3.10585900000000  | -4.60223000000000 | -1.06395400000000 |
| C | 2.25530700000000  | -3.66930900000000 | -1.69174900000000 |
| C | 1.48619000000000  | -2.80515900000000 | -0.90293000000000 |
| C | -0.71657900000000 | -2.08646500000000 | 0.67531800000000  |
| C | -1.83644200000000 | -2.44583800000000 | 1.43380300000000  |
| C | -3.05926600000000 | -2.77987600000000 | 0.77973800000000  |
| C | -3.13737200000000 | -2.72203900000000 | -0.64734400000000 |
| C | -1.99551000000000 | -2.33441300000000 | -1.40190100000000 |
| C | -0.79664900000000 | -2.03380200000000 | -0.74649800000000 |
| C | -0.80381300000000 | 1.06208600000000  | 0.86576800000000  |
| C | -1.91424000000000 | 1.30201300000000  | 1.68419900000000  |
| C | -3.17212600000000 | 1.61811600000000  | 1.09760400000000  |
| C | -3.30138500000000 | 1.66091100000000  | -0.32661600000000 |
| C | -2.16508500000000 | 1.38844900000000  | -1.14650100000000 |
| C | -0.92974700000000 | 1.10305700000000  | -0.55437900000000 |
| C | 1.26874900000000  | 2.06010100000000  | -0.70491000000000 |
| C | 1.40405900000000  | 2.00799800000000  | 0.70019200000000  |
| C | 2.23642500000000  | 2.93646100000000  | 1.36636100000000  |
| C | 2.87632900000000  | 3.94504700000000  | 0.59259300000000  |
| C | 2.70917400000000  | 3.99729300000000  | -0.81842700000000 |
| C | 1.90337200000000  | 3.02816100000000  | -1.49309200000000 |
| H | 2.46873200000000  | -3.84005500000000 | 2.22973100000000  |
| H | 3.70932100000000  | -5.28599100000000 | -1.67524300000000 |
| H | 2.19614900000000  | -3.62108000000000 | -2.78849500000000 |
| H | -1.77171400000000 | -2.51159600000000 | 2.52806700000000  |

|    |                   |                   |                   |
|----|-------------------|-------------------|-------------------|
| H  | -3.89314800000000 | -3.20227300000000 | 1.35783800000000  |
| H  | -4.04059800000000 | -3.07949600000000 | -1.16057300000000 |
| H  | -2.05257500000000 | -2.30667500000000 | -2.49846200000000 |
| N  | 2.41717000000000  | 2.93779600000000  | 2.75079300000000  |
| N  | 3.65225500000000  | 4.97788800000000  | 1.19194800000000  |
| N  | 3.35274000000000  | 4.99984500000000  | -1.51712700000000 |
| H  | 2.13053300000000  | -0.30039700000000 | -1.29145500000000 |
| H  | 0.30760800000000  | 1.03762400000000  | -2.36618600000000 |
| H  | 0.68298100000000  | 0.81409100000000  | 2.42830800000000  |
| H  | 0.45650300000000  | -1.70387500000000 | -2.50574000000000 |
| H  | 0.72968800000000  | -1.90579900000000 | 2.30404500000000  |
| C  | 1.23151700000000  | -0.44993900000000 | 0.70181300000000  |
| H  | 2.29951600000000  | -0.43820500000000 | 0.98584200000000  |
| N  | 1.72419200000000  | 3.04187600000000  | -2.91357200000000 |
| H  | 3.84358600000000  | -5.39545500000000 | 0.81991700000000  |
| H  | 2.59966100000000  | 3.18285200000000  | -3.42754800000000 |
| H  | 1.02651800000000  | 3.71788600000000  | -3.24390500000000 |
| H  | 2.94522700000000  | 5.25524300000000  | -2.41653700000000 |
| H  | 3.64105600000000  | 5.78247100000000  | -0.92045000000000 |
| H  | 4.66900100000000  | 4.84482300000000  | 1.18102900000000  |
| H  | 3.32498100000000  | 5.28657800000000  | 2.10994700000000  |
| H  | 3.32202600000000  | 3.30245700000000  | 3.05489700000000  |
| H  | -1.81527300000000 | 1.28499100000000  | 2.77804900000000  |
| H  | -2.25864100000000 | 1.43944600000000  | -2.23968400000000 |
| H  | -4.23369000000000 | 2.02355000000000  | -0.78143700000000 |
| H  | -4.01253900000000 | 1.93015200000000  | 1.73239200000000  |
| H  | 2.16247100000000  | 2.08277200000000  | 3.24235200000000  |
| Ag | -3.65323000000000 | -0.57332300000000 | 0.28369000000000  |

10·Ag<sup>+</sup> E=-7333.336122839294 Hartree

|   |                   |                   |                   |
|---|-------------------|-------------------|-------------------|
| C | 1.11162874944163  | -0.29668136767622 | -0.88348117575197 |
| C | 0.49044986352562  | -1.63231078021246 | -1.41658840491852 |
| C | 0.73800843630479  | -1.75741966807530 | 1.18549163169277  |
| C | 0.60509050083116  | 0.90972454926008  | 1.31642918899533  |
| C | 0.40431779959026  | 1.04060226676510  | -1.28741079985948 |
| C | 1.59376738565587  | -2.78025029961533 | 0.44905489909117  |
| C | 2.45529201903405  | -3.70502285154976 | 1.03543766280676  |
| C | 3.19276315343465  | -4.58047483970923 | 0.20825348242027  |
| C | 3.05669443431338  | -4.51601138096923 | -1.19110908261453 |
| C | 2.18217137054989  | -3.57498440820626 | -1.77824888744817 |
| C | 1.45781925860547  | -2.71528631318639 | -0.95507556690497 |
| C | -0.67486935695314 | -2.02019796786529 | 0.70527377432157  |
| C | -1.73953734027976 | -2.42980167026200 | 1.50576543429751  |

|    |                   |                   |                   |
|----|-------------------|-------------------|-------------------|
| C  | -2.9766693924113  | -2.79634399599077 | 0.90091786013746  |
| C  | -3.12314550411925 | -2.70916095927109 | -0.52309290953241 |
| C  | -2.01429604594437 | -2.28344703143442 | -1.32022068141641 |
| C  | -0.81036109950260 | -1.94727078618427 | -0.70415102546521 |
| C  | -0.81762696431024 | 1.10754675818541  | 0.83776609379492  |
| C  | -1.94014262376630 | 1.32230198677197  | 1.64729570028980  |
| C  | -3.19208728086148 | 1.65142820794415  | 1.04908591387539  |
| C  | -3.29975697310330 | 1.72651451889696  | -0.37645633493051 |
| C  | -2.15480892852826 | 1.47345077087075  | -1.18658920530789 |
| C  | -0.92613840676901 | 1.18302170808461  | -0.58136402765559 |
| C  | 1.28405122324568  | 2.14265372488009  | -0.69670520180956 |
| C  | 1.39000516639117  | 2.07398845871454  | 0.71273342213181  |
| C  | 2.17363335397527  | 3.00017044631974  | 1.41132072942497  |
| C  | 2.85335221602813  | 4.00466576423263  | 0.69280527460193  |
| C  | 2.74726634985584  | 4.07391835045081  | -0.70731146719155 |
| C  | 1.96049021450725  | 3.13906449231325  | -1.41063521228524 |
| F  | 2.59994452444533  | -3.77761570656271 | 2.35849844948767  |
| F  | 3.75180066274922  | -5.34500119550352 | -1.95652350504353 |
| F  | 2.06856301396102  | -3.52686658102138 | -3.10532365330617 |
| F  | -1.62904891699385 | -2.52367843416526 | 2.82585860313710  |
| F  | -3.93994649428829 | -3.35313113352386 | 1.62241039424606  |
| F  | -4.20942070176889 | -3.21540950297728 | -1.09883200054700 |
| F  | -2.16085121608593 | -2.25230143475631 | -2.63948886164428 |
| H  | -1.85532783937449 | 1.28537165571537  | 2.74182938313795  |
| H  | -4.03875643964598 | 1.95670158931655  | 1.67918554375902  |
| H  | -4.22973691418554 | 2.08825688934929  | -0.83655706092644 |
| H  | -2.23547982168283 | 1.55077828493082  | -2.27914712507092 |
| H  | 2.25820984545282  | 2.94578511799319  | 2.50586028416806  |
| H  | 3.46611245791294  | 4.73856291758402  | 1.23242988183009  |
| H  | 3.27722861455589  | 4.86193410986724  | -1.25791120557169 |
| H  | 2.11974990280192  | -0.24398856569066 | -1.33103536741136 |
| H  | 0.30707411049244  | 1.12325470514702  | -2.38455038385094 |
| H  | 0.67618122604483  | 0.87972047258489  | 2.41849945352143  |
| H  | 0.37302485697264  | -1.61733662998945 | -2.51198103340019 |
| H  | 0.82896133941099  | -1.84721107438718 | 2.28022696376904  |
| C  | 1.24613386748393  | -0.36782039926561 | 0.67661917554353  |
| H  | 2.31592325305918  | -0.32808140333387 | 0.94926476339907  |
| H  | 1.87972004085178  | 3.19289463284185  | -2.50559991242779 |
| F  | 4.01463579512782  | -5.46966823709042 | 0.74705496481679  |
| Ag | -3.63087919920822 | -0.51558476054480 | 0.25703516359483  |

\compound{11}{ } E=\$-10233.357804992873 Hartree

\begin{verbatim}

|   |                  |                   |                   |
|---|------------------|-------------------|-------------------|
| C | 1.13303943234859 | -0.30206106881440 | -0.88482045260690 |
| C | 0.52754715950284 | -1.64203839607049 | -1.41899504026256 |

|    |                   |                   |                   |
|----|-------------------|-------------------|-------------------|
| C  | 0.75507998556075  | -1.76847599290057 | 1.17061467100198  |
| C  | 0.62102281302362  | 0.89007896340027  | 1.32001120335081  |
| C  | 0.39584677841885  | 1.01975672050430  | -1.28288827646309 |
| C  | 1.61730486052366  | -2.79473790418944 | 0.44526651978977  |
| C  | 2.48315173317728  | -3.72113992384258 | 1.03919491761144  |
| C  | 3.23762257881905  | -4.59876612663604 | 0.21829637283586  |
| C  | 3.11349266678869  | -4.52978036813012 | -1.19293395884192 |
| C  | 2.23620267935865  | -3.58260662548124 | -1.78121617734074 |
| C  | 1.49483883454256  | -2.72591398929797 | -0.95809566451895 |
| C  | -0.65777666544728 | -2.02262431312898 | 0.68639833681422  |
| C  | -1.75576779834891 | -2.36065982703513 | 1.48621123689273  |
| C  | -3.00407314793440 | -2.69464796347825 | 0.87043235283351  |
| C  | -3.12885727787350 | -2.62757769851396 | -0.56236847210700 |
| C  | -2.00306709131412 | -2.22601745945250 | -1.34995761261151 |
| C  | -0.78107622371194 | -1.95499405963068 | -0.72357231484032 |
| C  | -0.80837529398885 | 1.07688360517420  | 0.85483071352186  |
| C  | -1.91862724313092 | 1.30694691239775  | 1.67598267100490  |
| C  | -3.17078196911465 | 1.65758457572098  | 1.09102602961961  |
| C  | -3.29406294271094 | 1.72778300687846  | -0.33465808475417 |
| C  | -2.16351376091243 | 1.44634161935744  | -1.15650050544750 |
| C  | -0.93113064275877 | 1.14712703167273  | -0.56374740513973 |
| C  | 1.26343249238309  | 2.13539512059011  | -0.69853273051143 |
| C  | 1.38558215575296  | 2.06505499372794  | 0.70980576567137  |
| C  | 2.16324097198552  | 3.00102510587997  | 1.40180534516347  |
| C  | 2.82021298513725  | 4.01710364013774  | 0.67832962973083  |
| C  | 2.69758884974062  | 4.08815330002606  | -0.72030901770052 |
| C  | 1.91715460215589  | 3.14319583632288  | -1.41730001954479 |
| Cl | 2.63674063253725  | -3.79089739972821 | 2.77031677185027  |
| Cl | 4.02731635796708  | -5.59912348885776 | -2.19257462855006 |
| Cl | 2.08725596447365  | -3.48289788679793 | -3.51079575318887 |
| Cl | -1.62753009802542 | -2.36174270173652 | 3.21338357935870  |
| Cl | -4.31447763831605 | -3.31703625194496 | 1.82900316913992  |
| Cl | -4.58909301677011 | -3.17211854217445 | -1.33304756559178 |
| Cl | -2.17473340601370 | -2.06866724231579 | -3.06607130225092 |
| H  | -1.82154906330940 | 1.27171434008354  | 2.76912599840406  |
| H  | -3.99995376706417 | 1.99180076445179  | 1.72995521895368  |
| H  | -4.21771004033567 | 2.11552657801357  | -0.78671472730697 |
| H  | -2.25494285697861 | 1.51780011702114  | -2.24859465617366 |
| H  | 2.26068703501655  | 2.94524852330382  | 2.49514944094527  |
| H  | 3.42826862759691  | 4.75856644954658  | 1.21296148987209  |
| H  | 3.20991974915636  | 4.88514121231524  | -1.27468123214321 |
| H  | 2.13766697932696  | -0.23179516961713 | -1.33813246508126 |
| H  | 0.28680832464983  | 1.09957524567744  | -2.37881635370906 |
| H  | 0.70249563706393  | 0.85815040958613  | 2.42094568437943  |
| H  | 0.41994332196516  | -1.62965624220053 | -2.51427225509064 |

|    |                   |                   |                   |
|----|-------------------|-------------------|-------------------|
| H  | 0.84085972785221  | -1.86421672277769 | 2.26369311964764  |
| C  | 1.26912960019888  | -0.37831883741545 | 0.67203789492349  |
| H  | 2.33782315901600  | -0.34130826480202 | 0.94959620664130  |
| H  | 1.82375000072842  | 3.19790386926105  | -2.51117719740181 |
| Cl | 4.30334738055808  | -5.74950963992510 | 0.93715639082392  |
| Ag | -3.73417813326728 | -0.47705583415525 | 0.31924913839723  |

12·Ag<sup>+</sup> E=-7276.755116584327 Hartree

|   |                   |                   |                   |
|---|-------------------|-------------------|-------------------|
| C | 0.35575138904256  | -1.48541625655894 | 0.96602613903896  |
| C | -0.03992089550269 | -2.49050541665005 | -0.17513393101076 |
| C | -0.67930713696680 | -3.50734049123800 | 2.14993802953870  |
| C | -0.84414174963633 | -1.05602549857093 | 3.18377233220289  |
| C | -0.22247546220230 | -0.03748993962698 | 0.85458720059380  |
| C | 0.37147170420774  | -4.31867609551241 | 1.40258055788287  |
| C | 0.99878709436569  | -5.48781098216209 | 1.87587857108979  |
| C | 1.99261966885921  | -6.12051120960887 | 1.06904600963574  |
| C | 2.33939143107737  | -5.56818209136256 | -0.19480527364021 |
| C | 1.69418328808510  | -4.38074887830709 | -0.65647154117004 |
| C | 0.71568805719827  | -3.77152193076931 | 0.15305713064216  |
| C | -1.84585213642014 | -3.41159188480439 | 1.19425716724271  |
| C | -3.15900506000858 | -3.84216499095419 | 1.45661056144377  |
| C | -4.14401740940852 | -3.78927445106924 | 0.40919338264418  |
| C | -3.79035515719660 | -3.23339833913729 | -0.87186961663635 |
| C | -2.45821141288442 | -2.73592444743190 | -1.08548329995063 |
| C | -1.49974421915563 | -2.86328400577936 | -0.06394347023460 |
| C | -2.05019912023070 | -0.56473017576947 | 2.40805872004107  |
| C | -3.36159089438453 | -0.48660957033069 | 2.89252767653773  |
| C | -4.35195629269320 | 0.20314052312168  | 2.13486217174054  |
| C | -4.01197570115249 | 0.76093195899189  | 0.85821005493578  |
| C | -2.68518190161951 | 0.61965154885115  | 0.35495362451912  |
| C | -1.71158596854087 | -0.01187746072090 | 1.13847878816767  |
| C | 0.41139821418600  | 0.71289898651378  | 2.02720341576780  |
| C | 0.07587005149752  | 0.16164591474032  | 3.28652004920925  |
| C | 0.58540469459011  | 0.71927449642844  | 4.46473932384231  |
| C | 1.43771908263061  | 1.83874561867132  | 4.37812056944369  |
| C | 1.77140344656297  | 2.38601204513121  | 3.12688253009794  |
| C | 1.25861229373157  | 1.82364247696175  | 1.94048941921594  |
| C | 0.63319317881624  | -6.01382381659218 | 3.15540526410709  |
| C | 3.33372377455160  | -6.19799775952139 | -1.00615821173905 |
| C | 2.02686090626683  | -3.79808347653698 | -1.92034738924362 |
| C | -3.52903760587215 | -4.27252851804491 | 2.76738826522609  |
| C | -5.46141342306716 | -4.31265058803367 | 0.62662698967650  |
| C | -4.75719175016635 | -3.19373974117022 | -1.92958774829116 |

|    |                   |                   |                   |
|----|-------------------|-------------------|-------------------|
| C  | -2.13018838233416 | -2.06401698026706 | -2.30273684798109 |
| H  | -3.61850769289057 | -0.89256660373270 | 3.87952238754688  |
| H  | -5.33207052139363 | 0.41873886678069  | 2.58348450230821  |
| H  | -4.73011980774160 | 1.40600791227302  | 0.33236207424196  |
| H  | -2.42169197375460 | 1.06668467494203  | -0.61242726256239 |
| H  | 0.32455894960947  | 0.29366788985941  | 5.44308979601576  |
| H  | 1.83927689723226  | 2.28709584689451  | 5.29537281192570  |
| H  | 2.43162912967227  | 3.26097367154337  | 3.07127911459476  |
| H  | 1.45234305086779  | -1.37962396478211 | 0.89441911048536  |
| H  | 0.02822352993990  | 0.41509008805875  | -0.12095094410816 |
| H  | -1.11687532670415 | -1.46365010778335 | 4.17213609610739  |
| H  | 0.22040234791193  | -2.09316958247639 | -1.17066279427307 |
| H  | -0.95773572940617 | -3.96784912472176 | 3.11213626125093  |
| C  | -0.02111371610123 | -2.09580257263131 | 2.35604422010309  |
| H  | 0.89860705128223  | -2.28550698533763 | 2.93792672086777  |
| H  | 1.51927888918631  | 2.25255072431953  | 0.96387586416279  |
| C  | 2.63534493961233  | -7.30845246444750 | 1.53725706669560  |
| N  | 3.15612044438513  | -8.28247552236010 | 1.93261859126404  |
| N  | 0.28854545908801  | -6.38636505588577 | 4.21344674225395  |
| N  | 4.14876386995694  | -6.70637198596761 | -1.67961760632166 |
| N  | 2.25390552377704  | -3.26634679330108 | -2.94152965014597 |
| N  | -3.81450372545271 | -4.56275349773405 | 3.86804811108419  |
| N  | -6.54803973216373 | -4.71541934452788 | 0.81411187708477  |
| N  | -5.55748565024599 | -3.13413507253422 | -2.78632354655073 |
| N  | -1.84642837102763 | -1.45495397497072 | -3.26489401676219 |
| Ag | -4.76148643186587 | -1.42468659435764 | 0.48637885814444  |

13·Ag<sup>+</sup> E=-6981.489031625473 Hartree

|   |                   |                   |                   |
|---|-------------------|-------------------|-------------------|
| C | 1.09516400000000  | -0.33158600000000 | -0.91099700000000 |
| C | 0.40274500000000  | -1.65396300000000 | -1.40008800000000 |
| C | 0.77142900000000  | -1.76936000000000 | 1.18121200000000  |
| C | 0.64041400000000  | 0.89291100000000  | 1.27073000000000  |
| C | 0.44038100000000  | 1.03225600000000  | -1.30041200000000 |
| C | 1.57828400000000  | -2.81543700000000 | 0.41436900000000  |
| C | 2.46322700000000  | -3.75199500000000 | 0.96156600000000  |
| C | 3.14495100000000  | -4.63919600000000 | 0.10414500000000  |
| C | 2.93910600000000  | -4.58432700000000 | -1.28529300000000 |
| C | 2.04985200000000  | -3.63924800000000 | -1.83664400000000 |
| C | 1.37262500000000  | -2.75879600000000 | -0.98500300000000 |
| C | -0.66759300000000 | -2.00050400000000 | 0.78063200000000  |
| C | -1.72168500000000 | -2.34761500000000 | 1.63800500000000  |
| C | -2.98954700000000 | -2.66444900000000 | 1.10314200000000  |
| C | -3.20462200000000 | -2.61035600000000 | -0.30790900000000 |

|   |                    |                    |                    |
|---|--------------------|--------------------|--------------------|
| C | -2.122798000000000 | -2.238759000000000 | -1.173828000000000 |
| C | -0.867797000000000 | -1.934549000000000 | -0.625966000000000 |
| C | -0.796269000000000 | 1.099555000000000  | 0.807721000000000  |
| C | -1.911428000000000 | 1.315311000000000  | 1.633376000000000  |
| C | -3.168659000000000 | 1.706251000000000  | 1.030275000000000  |
| C | -3.207042000000000 | 2.012448000000000  | -0.378729000000000 |
| C | -2.073292000000000 | 1.687922000000000  | -1.216456000000000 |
| C | -0.892960000000000 | 1.235227000000000  | -0.603491000000000 |
| C | 1.359843000000000  | 2.110006000000000  | -0.729603000000000 |
| C | 1.433375000000000  | 2.061073000000000  | 0.684803000000000  |
| C | 2.162281000000000  | 3.026920000000000  | 1.400963000000000  |
| C | 2.829800000000000  | 4.050979000000000  | 0.671733000000000  |
| C | 2.867875000000000  | 4.014914000000000  | -0.742651000000000 |
| C | 2.082062000000000  | 3.068559000000000  | -1.459705000000000 |
| H | 2.624851000000000  | -3.795330000000000 | 2.047921000000000  |
| H | 3.471693000000000  | -5.281346000000000 | -1.945491000000000 |
| H | 1.889094000000000  | -3.595234000000000 | -2.923252000000000 |
| H | -1.558851000000000 | -2.401112000000000 | 2.722418000000000  |
| H | -3.800555000000000 | -2.999314000000000 | 1.762629000000000  |
| H | -4.135664000000000 | -3.009102000000000 | -0.736027000000000 |
| H | -2.267838000000000 | -2.248080000000000 | -2.263143000000000 |
| N | -1.910627000000000 | 1.158927000000000  | 3.030389000000000  |
| N | -4.218891000000000 | 2.131789000000000  | 1.864009000000000  |
| N | -4.290949000000000 | 2.717315000000000  | -0.908781000000000 |
| N | -2.186549000000000 | 2.043889000000000  | -2.578940000000000 |
| N | 2.235481000000000  | 3.106420000000000  | 2.814214000000000  |
| N | 3.530189000000000  | 5.053872000000000  | 1.358472000000000  |
| N | 3.618242000000000  | 4.971950000000000  | -1.438974000000000 |
| H | 2.091756000000000  | -0.330107000000000 | -1.387286000000000 |
| H | 0.343382000000000  | 1.094977000000000  | -2.400663000000000 |
| H | 0.726644000000000  | 0.839535000000000  | 2.373084000000000  |
| H | 0.231393000000000  | -1.633920000000000 | -2.491661000000000 |
| H | 0.917329000000000  | -1.845893000000000 | 2.274412000000000  |
| C | 1.275012000000000  | -0.387495000000000 | 0.642091000000000  |
| H | 2.352545000000000  | -0.344076000000000 | 0.883611000000000  |
| N | 2.142732000000000  | 3.136483000000000  | -2.879045000000000 |
| H | 3.838057000000000  | -5.378968000000000 | 0.526390000000000  |
| H | -5.143614000000000 | 2.124812000000000  | 1.426714000000000  |
| H | -4.235947000000000 | 1.641806000000000  | 2.763086000000000  |
| H | -4.060981000000000 | 3.097120000000000  | -1.834853000000000 |
| H | -4.647407000000000 | 3.448218000000000  | -0.283559000000000 |
| H | -1.296282000000000 | 2.114600000000000  | -3.072342000000000 |
| H | -2.865975000000000 | 1.507015000000000  | -3.125880000000000 |
| H | -1.031462000000000 | 0.804724000000000  | 3.408535000000000  |
| H | -2.207047000000000 | 1.997251000000000  | 3.543814000000000  |

|    |                   |                   |                   |
|----|-------------------|-------------------|-------------------|
| H  | 1.69352400000000  | 3.96509400000000  | -3.28324900000000 |
| H  | 1.84130500000000  | 2.29071700000000  | -3.36349700000000 |
| H  | 3.77518000000000  | 4.67925300000000  | -2.41003600000000 |
| H  | 4.50404000000000  | 5.20301100000000  | -0.97800100000000 |
| H  | 3.53359600000000  | 5.95036100000000  | 0.86139400000000  |
| H  | 3.18086600000000  | 5.16997400000000  | 2.31588100000000  |
| H  | 3.19317300000000  | 3.04943400000000  | 3.17825800000000  |
| H  | 1.63683700000000  | 2.44291100000000  | 3.30662600000000  |
| Ag | -3.56510900000000 | -0.37222700000000 | -0.03233100000000 |
